## RESEARCH ARTICLE

# Secondary metabolites of *Alternaria alternata* appraisal of their SARS-CoV-2 inhibitory and anti-inflammatory potentials

Fatma A. Moharram<sup>1‡</sup>, Reham R. Ibrahim<sup>1‡</sup>, Shahenda Mahgoub<sup>2</sup>, Mohamed S. Abdel-Aziz<sup>3</sup>, Ahmed M. Said<sup>4</sup>, Hui-Chi Huang<sup>5</sup>, Lo-Yun Chen<sup>6</sup>, Kuei-Hung Lai<sup>6,7,8\*</sup>, Nashwa Hashad<sup>1‡</sup>, Mohamed S. Mady<sup>1‡</sup>

**1** Department of Pharmacognosy, Faculty of Pharmacy, Helwan University, Cairo, Egypt, **2** Biochemistry and Molecular Biology Department, Faculty of Pharmacy, Helwan University, Cairo, Egypt, **3** Genetic Engineering and Biotechnology Division, Microbial Chemistry Department, National Research Centre, Giza, Egypt, **4** Department of Pharmaceutical Organic Chemistry, Faculty of Pharmacy, Helwan University, Cairo, Egypt, **5** School of Chinese Medicine, China Medical University, Taichung, Taiwan, **6** Graduate Institute of Pharmacognosy, College of Pharmacy, Taipei Medical University, Taipei, Taiwan, **7** PhD Program in Clinical Drug Development of Herbal Medicine, College of Pharmacy, Taipei Medical University, Taipei, Taiwan, **8** Traditional Herbal Medicine Research Center, Taipei Medical University Hospital, Taipei, Taiwan

‡ FAM and RRI share the first authorship. NH and MSM share the last authorship.

\* [kueihunglai@tmu.edu.tw](mailto:kueihunglai@tmu.edu.tw)

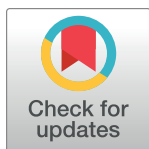

## OPEN ACCESS

**Citation:** Moharram FA, Ibrahim RR, Mahgoub S, Abdel-Aziz MS, Said AM, Huang H-C, et al. (2025) Secondary metabolites of *Alternaria alternata* appraisal of their SARS-CoV-2 inhibitory and anti-inflammatory potentials. PLoS ONE 20(1): e0313616. <https://doi.org/10.1371/journal.pone.0313616>

**Editor:** Vinh Le Ba, University of Bergen: Universitetet i Bergen, NORWAY

**Received:** September 5, 2024

**Accepted:** October 28, 2024

**Published:** January 24, 2025

**Copyright:** © 2025 Moharram et al. This is an open access article distributed under the terms of the [Creative Commons Attribution License](https://creativecommons.org/licenses/by/4.0/), which permits unrestricted use, distribution, and reproduction in any medium, provided the original author and source are credited.

**Data Availability Statement:** The original contributions presented in the research are included in the manuscript / supp. material/ referenced in the article and further queries can be engaged to the corresponding authors. Primary NMR data files included inside the manuscript are included in the following repository <https://doi.org/10.6084/m9.figshare.27172662>.

**Funding:** The grants that supported this work were from the National Science and Technology Council

## Abstract

This study identifies the secondary metabolites from *Alternaria alternata* and evaluates their ACE-2: Spike RBD (SARS-CoV-2) inhibitory activity confirmed *via* immunoblotting in human lung microvascular endothelial cells. In addition, their *in vitro* anti-inflammatory potential was assessed using a cell-based assay in LPS-treated RAW 264.7 macrophage cells. Two novel compounds, altenulene (**1**), phthalic acid bis (7'7" pentyloxy) isohexyl ester (**2**), along with 1-deoxyrubralactone (**3**) alternariol-5-*O*-methyl ether (**4**) and alternariol (**5**) were identified. Molecular docking and *in vitro* studies showed that compounds **2** and **4** were promising to counteract SARS-CoV-2 attachment to human ACE-2. Thus, they are considered promising natural anti-viral agents. SwissADME *in silico* analysis was conducted to predict the drug-like potential. Immunoblotting analysis confirmed that the tested compounds (**1–4**) demonstrated downregulation of ACE-2 expression in the endothelial cells from the lungs with variable degrees. Furthermore, the tested compounds (**1–4**) showed promising anti-inflammatory activities through TNF- $\alpha$ : TNFR2 inhibitory activity and their inhibitory effect on the proinflammatory cytokines (TNF- $\alpha$  and IL-6) in LPS-stimulated monocytes. In conclusion, our study, for the first time, provides beneficial experimental confirmation for the efficiency of the *A. alternata* secondary metabolites for the treatment of COVID-19 as they hinder SARS-CoV-2 infection and lower inflammatory responses initiated by SARS-CoV-2. *A. alternata* and its metabolites are considered in developing preventative and therapeutic tactics for COVID-19.

of Taiwan (MOST 111-2321-B-255-001), MOST 111-2320-B-038-040-MY3) and China Medical University (CMU110-MF-52).

**Competing interests:** The authors have declared that no competing interests exist.

## Introduction

Angiotensin-converting enzyme II (ACE-2) is a constitutional membrane protein found on many human cells with high expression in the vascular, heart, gastrointestinal, and type II lung alveolar cells [1]. ACE-2 is an essential part of the renin-angiotensin system (RAS) and regulates cardiac function [2]. Physiologically, ACE-2 catalyzes the conversion of angiotensin II (Ang II), a potent molecule with pro-inflammatory and vasoconstrictor properties, to Ang 1–7, thus counter-regulating the RAS through lowering Ang II [3]. Hence, working against the vasoconstrictive, pro-inflammatory, and pro-fibrotic effects of angiotensin II. Therefore, ACE-2 plays a crucial role in cardiovascular homeostasis. A critical aspect of ACE-2's biological significance is its involvement in hypertension and heart failure. Studies have shown that decreased ACE-2 activity leads to an imbalance in the renin-angiotensin-aldosterone system (RAAS), resulting in increased levels of Ang II and subsequent vasoconstriction, oxidative stress, inflammation, and fibrosis, which are contributing factors to hypertension and heart failure.

Furthermore, ACE-2 has been linked to atherosclerosis. Its protective effects on vascular function include vasodilation, anti-inflammatory actions on endothelial cells, inhibition of smooth muscle cell proliferation, and attenuation of oxidative stress, which are essential mechanisms for preventing the development and progression of atherosclerosis. Research has shown that upregulation or activation of ACE-2 can mitigate cardiac dysfunction post-myocardial infarction by reducing inflammation and fibrosis formation within the heart tissue, leading to improved cardiac function [4–6].

ACE-2 has attracted much attention as an efficient receptor for coronavirus that results in severe acute respiratory syndrome (SARS). ACE-2 receptor is the main target of SARS-CoV-2 since it plays a vital role in the virus's spread to alveolar cells [7]. The SARS-CoV-2 spike S1 protein—ACE-2 receptor complex is proteolytically maneuvered by type-2 transmembrane cellular serine protease (TMPRSS2) a cell surface protein mainly expressed by endothelial cells within the respiratory and digestive tracts, leading to cleavage of ACE-2 and stimulation of the spike protein, thus permitting viral entrance into the target cells. Thus, cells with ACE-2 and TMPRSS2 are more prone to viral entry [8]. ACE-2 facilitates not only the attack and rapid replication of SARS-CoV-2 but also the virus-induced damage in the membrane-bound ACE-2 protein, leading to the elevation of Ang II, which in turn triggers the release of NF- $\kappa$ B and pro-inflammatory cytokines [9, 10], together with the TNF- $\alpha$  /IL-6 pathways stimulation [11]. Thus, it ultimately results in acute damage to lung tissues [12].

Furthermore, recent findings show that NF- $\kappa$ B is also expressed in forming blood platelets, facilitating thrombus in COVID-19 patients [13]. Natural product has demonstrated a significant anti-inflammatory potential and offered to humanity several chemical entities that can modulate a wide range of inflammatory regulatory targets. Among these mechanisms is through interaction with intracellular signal-transducing pathways and regulation of the expression of inflammation-related genes such as nuclear factor kappa B (NF- $\kappa$ B), extracellular signal-regulated kinase (ERK), p38, and c-Jun N-terminal kinase (JNK) [14].

SARS-CoV-2 genome encodes for 16 and 4 non-structural structural proteins, respectively, in addition to accessory proteins [15]. SARS-CoV-2 attaches to ACE-2 for humans *via* binding of the spike (S) protein, which contains S1 and S2 subunits [16]. The subunit S1 comprises a signal peptide, C-terminal, and N-terminal domains. It is V-shaped with a receptor-binding domain (RBD), which was reported to be accountable for binding to the host ACE-2, while the S2 subunit is composed of different motifs. The fusion peptide is considered the most significant component in the viral fusion. It helps membrane fusion to the host cells, initiating a chain of conformational modifications, which reveals the cleavage of the S2 subunit,

membrane fusion, and ultimately viral entry [15, 17, 18]. A computational study of FDA-approved drugs and phytochemicals from some medicinal plants against the ACE2-spike complex revealed that the five best hits from the FDA-approved database were rutin DAB10, fulvestrant, cefoperazone acid, pinaverium bromide, as well as abitrexate [19].

It was reported that ACE-2 expression is negatively connected with COVID-19 mortality [20]. Thus, ACE-2 blockers are a possible objective for antiviral intervention. Subsequently, natural product sources should be explored to find proper and potentially effective compounds against COVID-19 [21].

Moreover, the pathology of COVID-19 disease was noticed to be linked to the hyperinflammatory response referred to as a cytokine storm, which is an extreme increase in the circulating levels of pro-inflammatory cytokines including IL-1, IL-2, IL-6, IFN- $\gamma$ , and TNF- $\alpha$  (a key role player in the cytokine storm), [22, 23], leading to ARDS (acute respiratory distress syndrome), intravascular coagulation, multiorgan failure and eventually death [24]. Recent studies reported a close relation between anti-TNF- $\alpha$  agents and ACE-2 inhibition. At the same time, ACE-2 /SARS-CoV-2 interaction leads to A disintegrin and metalloprotease 17 (ADAM17) activation, known as sheddase protein, or tumor necrosis factor- $\alpha$ -converting enzyme (TACE). The shedding activity of this protein affects the extracellular domains of other transmembrane proteins like pro-TNF- $\alpha$  and IL-6 receptor, causing the release of the soluble forms of IL-6 receptor and TNF- $\alpha$  and, subsequently, the inflammation linked to the SARS-CoV-2 infection [25]. Thus, TNF- $\alpha$  / IL-6R inhibitors may decrease tissue damage since this action greatly depends on creating soluble IL-6 receptors and TNF- $\alpha$ .

Structural studies enable the dissection of the formed complex between the ligand (small molecule) and the protein (receptor) and the identification of the critical residues responsible for its interaction. Several research groups worked diligently to determine the X-ray crystal structures of different SARS-CoV-2 parts and how mechanistically the virus can enter the human body. The most common way was through the viral surface glycoprotein (S) waltz with ACE2, allowing the virus entry [26]. Molecular docking is a computational procedure mainly used to predict the non-covalent binding of ligand-target interactions based on information derived from the knowledge of the 3D structure of a target of interest. In this study, we employed molecular docking to potentially enable guidance for anti-SARS-CoV-2 drug discovery. Additionally, a molecular dynamic simulation (MD) study was performed to validate the stability and strength of the complex formed between our compounds and the hACE2 protein. Several natural products such as polyphenolic and alkaloids have demonstrated either antagonist effects against viral entry or cell recognition through interaction with different binding receptor-binding of SARS-CoV-2 spike protein [27, 28].

*Callistemon viminalis* (weeping bottlebrush, F. Myrtaceae) is a small tree or shrub native to tropical regions such as Australia, India, and South America [29] and cultivated in Egypt. It was traditionally used to treat skin infections and gastrointestinal and respiratory disorders [30, 31]. *C. viminalis* contains essential oil and many bioactive metabolites such as polyphenols [32–36] and phloroglucinol [37–39]. From the biological point of view, its extract was found to exert different biological activities as cytotoxic [32, 40, 41], antioxidant [33, 34, 40–44], hepatoprotective [33], antidiabetic [45], and analgesic activities [46]. Microorganisms that live in the plant tissue in a symbiotic approach are commonly known as endophytes [47] as well as, and they represent an essential source of new and bioactive compounds with a chemical diversity structure [48]. *Alternaria alternata* (MN518330) was identified from *C. viminalis* leaves based on its morphological features and comparison of rDNA ITS sequence with that of *Alternaria* species. Previous reports revealed that *A. alternata* metabolites are considered a fungal pathogen that leads to disease for fruits and crops [49] due to the production of various phytotoxins [50]. *A. alternata* has several metabolites with a broad chemical structure diversity, such as

steroids, terpenoids, quinones, phenolics, and nitrogen-containing compounds [51–53]. It has been stated that some of these metabolites act as mycotoxins and phytotoxins. Also, they possess various biological activities such as anticancer, antiallergic, anti-microbial, algicidal, plant growth regulation, immunomodulatory, and antimalarial [48, 52, 53].

Vaccines and drugs are considered the most consistent ways against COVID-19. Therefore, there is an urgent need to discover new drugs, especially with the incidence of mutation and genomic strains [54]. Microbes like fungi and bacteria have huge promise as a BioSource for discovering biologically active natural products, including antivirals. Furthermore, natural products make outstanding candidates for drug discovery due to their chemical diversity being more closely allied with drugs than synthetic ones; in addition, their low side effects and cost make them a rich source of biologically active agents that help in the production of different drugs [55]. Moreover, bioactive phytochemicals may become encouraging tools as adjuvants for SARS-CoV-2 infection treatment as they could assist in decreasing the inflammation in COVID-19 patients with their anti-inflammatory properties, in association with classical anti-inflammatory agents [56]. Even many natural metabolites from plants and synthetic drugs were studied for their antiviral activity but they were considerably less effective when tested in animal models. Therefore, we try to search for an alternative source of safe and economically cost-effective antiviral metabolites from microbes and study their mechanism of action. Moreover, even several metabolites and extracts of *A. alternate* were analysed for their different biological activity [57] but few reports about their effects for controlling COVID-19 extract, among this metabolite are alternariol and alternariol-(9)-methyl ether, which studied by different computational methods. Also its EtOAc extract and the isolated compounds exhibited antiviral activity against hepatitis C [58]. Therefore, the current study aimed to isolate secondary metabolites from *A. alternate* and for the first time study their effect on SARS-CoV-2 through inhibition of ACE2/ spike RBD and controlling the inflammation. In addition, docking and molecular dynamic simulation and *in-silico* drug-like prediction were conducted to ensure safety and care.

## Methods and materials

### General

Stationary phase for column and analytical TLC, including silica gel 60, silica gel 60 F<sub>254</sub>, and Sephadex LH-20, were supplied from Sigma-Aldrich, Germany). Bruker Avance HD III (Bruker, Germany) was used for measuring <sup>1</sup>H (400 MHz) and <sup>13</sup>C NMR (100 MHz), and the results were described as  $\delta$  ppm values comparative to the internal reference (TMS) with sample concentration of 2mg/ml and operation temperature of 25°C. ESI-MS was performed on a XEVO TQD triple quadrupole LC-MS. (Waters Corporation, USA). All other chemicals and solvents were obtained from El Nasr Company (Cairo, Egypt).

### Plant collection

*C. viminalis* (Sol. ex Gaertn.) G. Don., F. Myrtaceae) fresh leaves were obtained from the El Qanater El Khayreya botanical garden, Egypt (12/2016) at the end of the flowering stage following the local garden's guidelines for collection and complying with the collection legislation of Egypt. *C. viminalis* is an ornamental tree cultivated in Egypt. Plant Authentication was recognized by Dr. Trease Labib (Mazhar Botanical Garden Egypt). The plant was deposited at the Herbarium of Pharmacognosy Department, Helwan University, Egypt (no 16 Mvi1/2016) and another plant sample was deposited at the Herbarium of El Orman Botanical Garden- El Giza-Egypt (no. 001149CC-000118-04-07-04-00118).

## Fungal isolation

Small pieces of *C.viminalis* leaves were washed with distilled sterilized water followed by careful treatment for the surface by 70% aqueous EtOH (two times, 2 min), then rinsed with sterilized distilled water and dried [59, 60]. The outer surface was scratched using the sterile blade, and the inner tissue was cut into small pieces, each 1 cm in length, and then carefully located onto plates of PDA (potato dextrose agar) [61]. Neomycin (50 mg/L) was added to stop the growth of bacteria [62]. The plates were incubated after being sealed with Parafilm for 3–6 weeks (27°C). The resultant colonies were transported to new PDA media and retained at  $\approx 4^\circ\text{C}$ . Isolation of the pure strains was done by repeating the sub-culturing.

## Fungal identification

The fungal strains were identified as described in our previous work [63].

DNA sequence present in NCBI Gen Bank (<http://www.ncbi.nlm.nih.gov>) was used to compare the DNA sequence of the purified fungi. The phylogenetic tree was constructed using Molecular Evolutionary Genetics Analysis (MEGA, version 10.0.5) (<https://www.megasoftware.net/>) (S26 Fig).

## Extraction of the bioactive metabolites

To prepare the mass growth of the purely cultivated fungus, it was grown on 100 g solid rice medium in Erlenmeyer flasks (10 x 1 L) and then incubated at static conditions for 14 days at 30°C. After that, rice culture media was cut into small pieces and then subjected to exhaustive extraction using ethyl acetate (EtOAc), followed by evaporation till dryness (5.8 g). The EtOAc extract was fractionated on silica gel vacuum liquid chromatography (VLC) eluted by step-gradient solvent systems of *n*-hexane, petroleum ether, dichloromethane, and EtOAc to isolate the compounds. Each fraction was evaporated under reduced pressure to give 0.25, 0.5, 2.0, and 0.65 for *n*-hexane, PE, DCM, and EtOAc respectively. Fractionation of PE fraction on a column of silica gel (SGC) eluted with PE / DCM (50:50 v/v) yielding pure sample of compound 1 (20 mg). DCM fraction was subjected to SGC eluted with DCM to afford three sub-fractions; 1<sup>st</sup> one was further purified by SGC eluted with *n*-hexane to afford 17 mg of compound 2. In contrast, compound 3 (15 mg) was purified from the 2<sup>nd</sup> subfraction using SGC and stepwise elution using PE and EtOAc (1–0: 1–1:0:1 v/v). Moreover, compound 4 (30 mg) was obtained from the 3<sup>rd</sup> one by precipitation from DCM solution using excess *n*-hexane. Compound 5 (5 mg) was isolated from EtOAc fraction through SGC and gradient elution with DCM: MeOH (1:1 v/v). The purity of the obtained samples was carried out depending on their color with spray reagent on TLC and appearance under UV light [64] (Fig 1).

**Compound 1:** Colorless oil;  $^1\text{H}$ NMR,  $\text{CDCl}_3$  (400 MHz), and  $^{13}\text{C}$ NMR (100 MHz) results are represented in Table 1). +ve ESI/MS,  $m/z$  284.3294  $[\text{M}+\text{H}]^+$  (calcd for  $\text{C}_{20}\text{H}_{29}\text{N}$ ). 1 and 2D HNMR and ESI-MS spectrum are represented in supplementary information (S1–S7 Figs).

**Compound 2:** Faint yellow viscous oil;  $^1\text{H}$ NMR  $\text{CDCl}_3$  (400 MHz,  $\text{CDCl}_3$ ) and  $^{13}\text{C}$ NMR (100 MHz) data see Table 2. negative ESI-MS,  $m/z$  at 533.1912  $[\text{M}-\text{H}]^-$  (calcd, for  $\text{C}_{30}\text{H}_{46}\text{O}_8$ ). 1 and 2D HNMR and ESI-MS spectrum are represented in (S8–S14 Figs).

**Compound 3** was isolated as a colorless amorphous powder; negative ESI/MS,  $m/z$  259.1458  $[\text{M}-\text{H}]^-$  (calcd for  $\text{C}_{14}\text{H}_{12}\text{O}_5$ ).  $^1\text{H}$ NMR (400 MHz,  $\text{CDCl}_3$ ),  $\delta_{\text{H}}$  11.36 (s, 6-OH), 6.72 (1H, brs, H-9), 6.71 (1H, brs, H-7), 3.96 (3H, s, 8-OCH<sub>3</sub>); 3.45 (1H, m, H-1), 2.99 (1H, dd, 1.4, 19.9, H-2<sub>a</sub>), 2.35 (1H, dd, 0.4, 18.4, H-2<sub>b</sub>), 1.48 (3H, d,  $J = 6.8$ , 1-CH<sub>3</sub>);  $^{13}\text{C}$ NMR (100 MHz,  $\text{CDCl}_3$ ) data  $\delta_{\text{C}}$  95.2.1 (C-3), 166.8 (C-8), 165.3 (C-6), 164.9 (C-5), 148.2 (C-3<sub>a</sub>), 144.6 (C-10), 134.5 (C-9<sub>a</sub>), 103.06 (C-9), 100.9(C-5<sub>a</sub>), 56.03 (8-OCH<sub>3</sub>), 42.8 (C-2), 28.4 (C-1), 21.0 (1-CH<sub>3</sub>). Spectroscopic results are represented in (S15–S20 Figs).



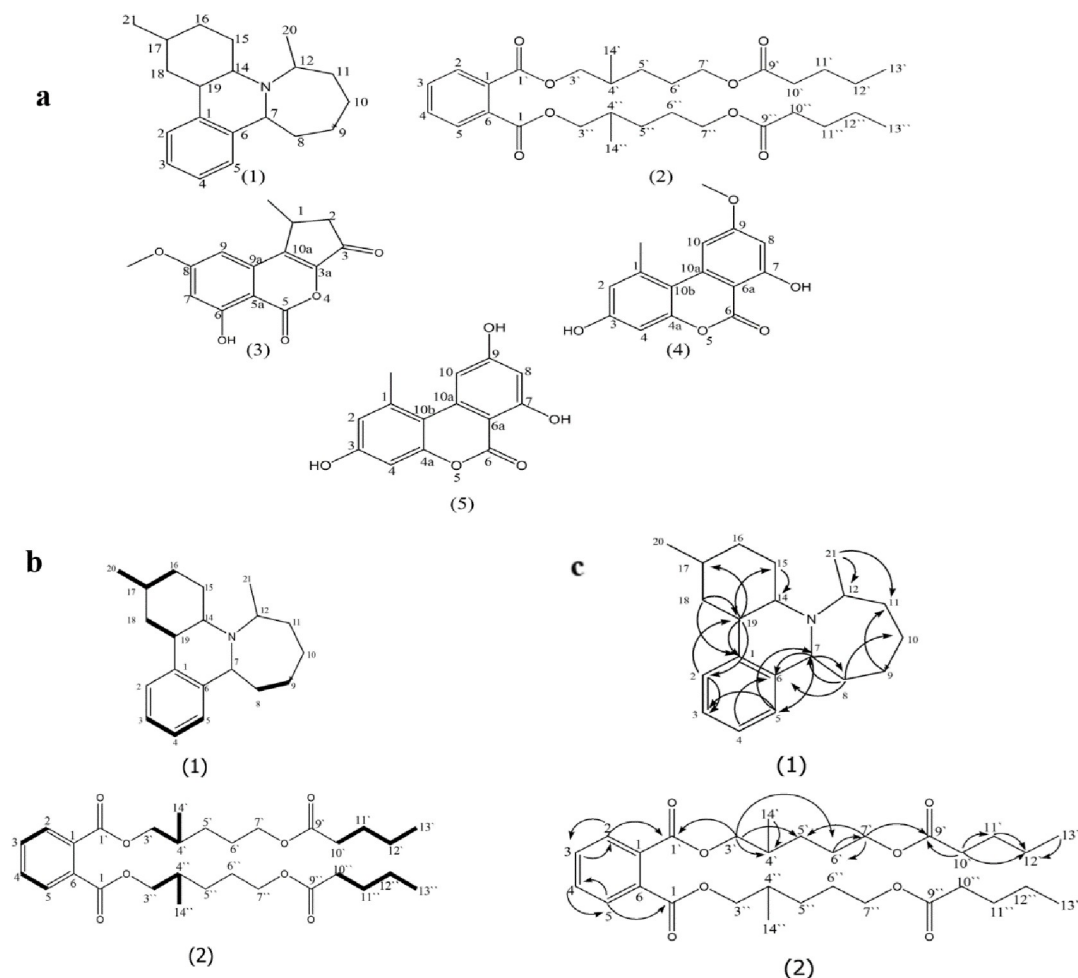

**Fig 1.** (a) Structures of compounds 1–5 from *A. alternate*. (b) H-HCOSY correlations of compounds 1 and 2. (c) HMBC correlations of compounds 1 and 2.

<https://doi.org/10.1371/journal.pone.0313616.g001>

**Compounds 4 and 5** were isolated as reddish-white needles as well as displaying blue fluorescence with long UV light (360 nm). They were identified as alternariol-5-O-methyl ether (4) and alternariol (5) based on a comparison of their  $^1\text{H}$  NMR and negative ESI-MS with previously published data [33]. The 1D HNMR and ESI spectrums are represented in (S21–S25 Figs).

### In silico evaluation using docking studies

The in-silico analysis for the isolated metabolites to block ACE-2-SARS-CoV-2 Spike RBD binding site was performed by evaluating the binding of the isolated compounds as well as a known natural inhibitor, quercetin, inside the ACE-2-SARS-CoV-2 Spike RBD binding site. The crystal structure of the SARS-CoV-2 spike receptor binding domain complexed with ACE-2 (PDB: 6LZG) was used. The 3D structures of the endophyte metabolites (1–4) were achieved by the software of Discovery Studio (Accelrys Inc., USA). AutoDock Vina (Scripps Research, California, USA) [65] prepared the receptor and ligands as pdbqt files after eliminating water, adding polar hydrogen atoms, and Gasteiger charges, respectively. AutoDock Vina uses a Monte-Carlo iterated local search method involving iterations of sampling, scoring, and

Table 1. <sup>1</sup>H and <sup>13</sup>C NMR data for compound 1 (CDCl<sub>3</sub>, 400 and 100 MHz).

| No | δ <sub>C</sub> | δ <sub>H</sub> * (mult; J = Hz) | HMBC                 | APT             | COSY |
|----|----------------|---------------------------------|----------------------|-----------------|------|
| 1  | 148.0          |                                 |                      | Q               |      |
| 2  | 127.1          | 7.36 (m)                        | C-19, C-3            | CH              |      |
| 3  | 125.8          | 7.33 (m)                        |                      | CH              | H-4  |
| 4  | 128.3          | 7.44 (m)                        | C-6                  | CH              | H-3  |
| 5  | 127.8          | 7.32 (m)                        | C-3, C-7             | CH              | H-4  |
| 6  | 146.5          |                                 |                      | Q               |      |
| 7  | 46.3           | 2.67 (br d)                     | C-5, C-6, C-8        | CH              |      |
| 8  | 37.2           | 1.79 (m)                        | C-6, C-7, C-10       |                 | H-9  |
| 9  | 27.8           | 1.35 (m)                        | C-11                 |                 | H-8  |
| 10 | 20.9           | 1.36 (m)                        |                      |                 |      |
| 11 | 29.9           | 1.87–1.7                        |                      |                 |      |
| 12 | 48.1           | 2.58 (m)                        |                      | CH              |      |
| 14 | 46.0           | 2.34 (m)                        |                      | CH              |      |
| 15 | 38.7           | 1.76 (m)                        | C-14                 |                 |      |
| 16 | 22.8           | 1.06 (m)                        | C-17, C-18           |                 | H-17 |
| 17 | 22.7           | 1.43 (m)                        | C-16                 |                 | H-20 |
| 18 | 32.1           | 1.42 (m)                        | C-1, C-19            |                 | H-19 |
| 19 | 40.2           | 2.86 (m)                        | C-1, C-2, C-15, C-17 | CH              | H-18 |
| 20 | 14.2           | 1.05 (br                        | C-17                 | CH <sub>3</sub> |      |
| 21 | 12.3           | 0.96 (br d)                     | C-11, C-12           | CH <sub>3</sub> |      |

\*Assignment of exact proton signals with its carbon are obtained from HMQC spectrum.

<https://doi.org/10.1371/journal.pone.0313616.t001>

optimization. The docking parameters were as follows: grid box size (34x42x54 Å<sup>3</sup>) was adjusted to encompass the interaction site. An exhaustive value of 8 and an energy range value of 4 were used while keeping the other parameters with their default values. The parameters

Table 2. <sup>1</sup>H and <sup>13</sup>C NMR data for compound 2 (CDCl<sub>3</sub>, 400 and 100 MHz).

| No       | δ <sub>C</sub> | δ <sub>H</sub> * (mult; J = Hz) | HMBC                                   | APT             | COSY                 |
|----------|----------------|---------------------------------|----------------------------------------|-----------------|----------------------|
| 1/6      | 132.5          |                                 |                                        | Q               |                      |
| 2/5      | 128.8          | 7.72 (br d)                     | C-3/4, 1'/1''                          | CH              | H-3/4                |
| 3/4      | 130.9          | 7.54 (br d)                     | C-2/5                                  | CH              | H-2/5                |
| 1'/1''   | 167.7          |                                 |                                        | Q               |                      |
| 3'/3''   | 68.2           | 4.24 (m)                        | C-1'/1'', C-4'/4'', C-5'/5'', C-6'/6'' | CH <sub>2</sub> | H-4'/4''             |
| 4'/4''   | 38.7           | 1.70 (m)                        | C-3'/3''                               | CH              | H-3'/3''             |
| 5'/5''   | 30.4           | 1.35 (m)                        |                                        | CH <sub>2</sub> |                      |
| 6'/6''   | 23.8           | 1.37–1.42 (m)                   | C-7'/7''                               | CH <sub>2</sub> |                      |
| 7'/7''   | 66.7           | 3.99 (m)                        | C-5'/5'', C-6'/6'', C-9'/9''           | CH <sub>2</sub> |                      |
| 9'/9''   | 174.0          |                                 |                                        | Q               |                      |
| 10'/10'' | 34.4           | 2.31 (t, 7.2)                   | C-9'/9'' C-11'/11'', C-12'/12''        | CH <sub>2</sub> | H-11'/11''           |
| 11'/11'' | 25.0           | 1.63 (m)                        | C-12'/12''                             | CH <sub>2</sub> | H-10'/10'', 12'/12'' |
| 12'/12'' | 29.1           | 1.32 (m)                        |                                        | CH <sub>2</sub> | H-11'/11'', 13'/13'' |
| 13'/13'' | 10.9           | 0.93 (m)                        | C-12'/12''                             | CH <sub>3</sub> | H-12'/12''           |
| 14'/14'' | 14.0           | 0.91 (d)                        | C-4'/4''                               | CH <sub>3</sub> |                      |

\*Assignment of exact proton signals with its carbon are obtained from HMQC spectrum.

<https://doi.org/10.1371/journal.pone.0313616.t002>

for docking were first validated by redocking the already bound ligand co-crystallized with the protein. The binding mode obtained matches that of the crystal structure; if a closely similar binding mode is received, the parameters are used for the docking studies. The most stable docking pose attained was nominated for comparing the binding mode. Visualization of ligand-protein non-covalent interactions, as well as schematic 2-D illustrations of enzyme-ligand complexes, was accomplished by the software Discovery Studio.

### Molecular dynamic simulation method

In this study, molecular dynamic simulations (MDS) were conducted for 100ns using GROMACS 2.1.1 software [66] on compound 2 and compound 4. The retrieved docking coordinates of ACE2 bound to compound 2 and compound 4 were used as input structures for molecular dynamics. The receptor and ligand topologies were generated by PDB2gmx (embedded in GROMACS) and GlycoBioChem PRODRG2 Server respectively, both under GROMOS96 force field. After rejoining ligands and receptor topologies to generate the system, the typical molecular dynamics scheme of GROMACS was applied for all the systems. This includes solvation, neutralization, energy minimization under GROMOS96 43a1 force field and two stages of equilibration (NVT and NPT). Finally, an unrestricted production stage of 100ns was applied for the four systems with particle mesh ewald (PME) method implemented to compute the long-range electrostatic values using 12 Å cut-off and 12 Å Fourier spacing. The first stage is to judge the stability of the complexes using RMSD and RMSF values calculated from the MDS trajectories from the production step. The second stage is performing MM-PBSA calculation and per residue contribution. The MM-PBSA package of Kumari *et al.* [67] was contrived to calculate the binding free energy between the ligands and the two receptors using the following equation.

$$\Delta G_{(\text{Binding})} = G_{(\text{Complex})} - G_{(\text{Receptor})} - G_{(\text{Ligand})}$$

All formed complexes were subjected to such calculations.

### *In-silico* pharmacokinetic analyses

We have used the open access *in silico* prediction tools for predicting the in silico ADMET properties of compounds (1–5) included in this study (Details are included in the supplementary materials) The available bioinformatics open access SwissADME (<http://www.swissadme.ch/index.php>) [67] was used for predicting the drug-likeness attributes. Lipinski's rule of five was used to analyze the properties such as hydrogen bond donor (HBD), hydrogen bond acceptor (HBA), molecular weight (MW), topological polar surface area (TPSA) and lipophilicity (log P) and PreADMET (<https://preadmet.bmdrc.kr/>) [68] was used to determine the toxicity attributes of selected compounds included in this study.

### Biological evaluation

#### **In vitro ACE-2: Spike RBD (SARS-CoV-2) inhibitor screening colorimetric assay.**

ACE-2: SARS-CoV-2 Spike (RBD), inhibitor screening colorimetric assay kit (Bps Bioscience, Cornerstone Court W, Ste B San Diego, CA 92121) was employed [69, 70] for evaluating the activity of compounds 1–4 and EtOAc extract of *A. alternate* with the guide of the manufacturer's directions. Different concentrations of EtOAc extract (0.038–9.60 µg/mL) and compounds 1–4 (1.25–50 µM) or quercetin as a positive control [71, 72] were utilized.

**Cultured cells & cell viability assay.** Human lung microvascular endothelial cells (HLMEC) were acquired from Lonza (Hayward, CA, USA). The cells were seeded in an



endothelial cell growth medium (EGM-2 MV) (Lonza, Hayward, CA, USA) at 37°C and 5% CO<sub>2</sub>. Then, at 5 to 7 passages, the cells were plated in 100 µL/well EGM-2 MV medium in collagen-covered 96-well plates. The cells were grown for 3–5 days to reach the confluent layer. Cell viability was valued by the MTT Cell Growth Assay Kit (Sigma-Aldrich, Steinheim, Germany) [73] using untreated cells as control.

**Determination of ACE-2 protein using western blot.** HLMEC cells were seeded, cultured, and incubated with compounds 1–4 for 48h. RIPA buffer (Cell Signaling, Danvers, MA) was employed to obtain the entire-cell protein lysates. Bradford method [74] was used to determine the concentration of protein. Western blot assay was done as previously stated [75] using untreated cells as control. Anti-ACE-2 antibody [EPR24705-45] ab272500 (Abcam, Cambridge, UK) was used.

**Evaluation of anti-inflammatory activity.** *In vitro* TNF-α [Biotinylated] inhibition assay. TNFR2: TNF-α [Biotinylated] inhibitor screening assay kit (BPS bioscience, Cornerstone Court W, Ste B San Diego, CA 92121) was used to screen for the *in vitro* inhibition of TNF-α binding to tumor necrosis factor receptor 2 (TNFR2) following the manufacturer's protocol [76, 77]. Different concentrations of EtOAc extract (0.48–7.60 µg/mL), compounds 1–4 (0.25–64 µM), or certolizumab as a positive control were utilized.

*Evaluation of pro-inflammatory cytokines (TNF-α and IL-6) using LPS-induced RAW 264.7 cells.* RAW 264.7 macrophage cells were procured from the American Type Culture Collection (Manassas, VA, USA) and grown as previously described. *In vitro* Toxicology Assay Kit, MTT Based (Sigma-Aldrich, Saint Louis, Missouri, USA) was employed to establish cell viability at concentrations (1–250 µM). Treatment of RAW 264.7 cells and determination of the inhibitory effect of the active compounds at sub IC<sub>50</sub> values on TNF-α and IL-6 gene expression in RAW264.7 cells were performed as mentioned before [78] using LPs treated cells as control. TNF-α, IL-6, and the housekeeping gene ACTB-specific RT primers are demonstrated in (S1 Table).

## Statistical analysis

The entire experimental records were obtained from three distinct experiments accomplished in trio. *p* values < 0.05 were considered significant. Statistical significance was obtained by One-Way Analysis of Variance (ANOVA) with post hoc Tukey via GraphPad Prism 5.0 (Graph Pad Inc., USA) as well as non-linear regression analysis for determination of IC<sub>50</sub> values.

## Results

### Molecular identification of the isolated endophytic fungus and compounds

The isolated fungus was identified as *Alternaria alternate* after comparing its 18S rRNA nucleotide sequence by the NCBI database, which exhibits 100% similarity with each other. It was deposited in Gen Bank with accession number MN518330, and its phylogenetic tree is represented in (S26 Fig). Moreover, it is preserved in Egypt Microbiological Culture Collection (EMCC) with an EMCC number 28558 on 29-3-2023.

Five compounds (1–5), (Fig 1) were isolated from EtOAc extract among which two new compounds (1 and 2), in addition to three known compounds 3, 4, and 5, identified as 1-deoxyrubrualactone (3), alternariol-5-O-methyl ether (4), and alternariol (5) based on the comparison of their NMR and MS data with reported data [33, 79, 80].

**Compound 1** was obtained in pure form as a colorless oil with molecular formula C<sub>20</sub>H<sub>29</sub>N. It displayed a molecular ion peak at *m/z* 284.3294 [M + H]<sup>+</sup>, indicating the presence of an odd number of N-atoms in the structure as well as the presence of seven degrees of

unsaturation, which confirmed the presence of three double bonds and four rings in the structure.  $^1\text{H}$ NMR spectrum displayed an unresolved aromatic system due to *ortho*- and *meta*-couplings at  $\delta_{\text{H}}$  7.44, 7.36, 7.33, and 7.32 for H-4, H-2, H-3, and H-5, respectively. Moreover, in the aliphatic area, five groups of protons establish the occurrence of five methine groups at  $\delta_{\text{H}}$  2.86, 2.67, 2.58, 2.34, and 1.43 for H-19, H-7, H-12, H-14, and H-17, respectively as well as, their downfield shift due to their position near to aromatic ring and a nitrogen atom. Moreover, a complex overlapping multiplet hydrogen proton signals for several methylene groups present in the same chemical environment. In addition, there are two broad doublet signals for the two-methyl groups CH<sub>3</sub>-20 ( $\delta_{\text{H}}$  1.05) and 21 ( $\delta_{\text{H}}$  0.96).  $^{13}\text{C}$ NMR spectrum showed 20 carbons, among which four aromatic methine groups ( $\delta_{\text{C}}$  125.8–128.3), five aliphatic carbons ( $\delta_{\text{C}}$  22.7–48.1), seven methylenes ( $\delta_{\text{C}}$  20.9–38.7), two methyl ( $\delta_{\text{C}}$  12.3 and 14.2) and two quaternary aromatic carbons. ( $\delta_{\text{C}}$  146.0–148.0). The three methine groups attached to the nitrogen atom were confirmed by their downfield shift at  $\delta_{\text{C}}$  48.1, 46.3, 46.0 for CH-12, 7, and 14, respectively. This evidence was established by HMQC and APT experiments. Moreover, the H-HCOSY (Fig 1) showed that the correlation between H-3 and H-5 with H-4 established the presence of an aromatic ring, and the correlation between H-17 and CH<sub>3</sub>-20 placed them at C-17. Moreover HMBC (Fig 1) confirmed the structure of **1** through the correlation of the aromatic H-2 ( $\delta_{\text{H}}$  7.36) with C-3 ( $\delta_{\text{C}}$  125.8) and C-19 ( $\delta_{\text{C}}$  40.2), H-4 ( $\delta_{\text{H}}$  7.44) with C-6 ( $\delta_{\text{C}}$  146.5) and that from H-5 ( $\delta_{\text{H}}$  7.32) to C-3 ( $\delta_{\text{C}}$  125.8) and C-7 ( $\delta_{\text{C}}$  46.3), which confirmed aromatic ring configuration and the connectivity between it and the side chain at C-2 and 6. The structure of the saturated rings and their connectivity were established through the correlation between different carbons and protons signals, among which the correlation from H-7 ( $\delta_{\text{H}}$  2.67) and C-5 ( $\delta_{\text{C}}$  127.8), C-6 ( $\delta_{\text{C}}$  146.5), C-8 ( $\delta_{\text{C}}$  37.2) and that between CH<sub>2</sub>-8 ( $\delta_{\text{H}}$  1.79), C-6 ( $\delta_{\text{C}}$  146.5), C-7 ( $\delta_{\text{C}}$  46.3) and C-10 ( $\delta_{\text{C}}$  20.9); CH<sub>2</sub>-9 ( $\delta_{\text{H}}$  1.35) with C-11 ( $\delta_{\text{C}}$  29.9); CH<sub>2</sub>-15 ( $\delta_{\text{H}}$  1.76) and C-14 ( $\delta_{\text{C}}$  46.0); CH<sub>2</sub>-16 ( $\delta_{\text{H}}$  1.06) with C-17 ( $\delta_{\text{C}}$  22.7), and C-18 ( $\delta_{\text{C}}$  32.1), CH<sub>2</sub>-18 ( $\delta_{\text{H}}$  1.42) with C-1 ( $\delta_{\text{C}}$  148.0), C-19 ( $\delta_{\text{C}}$  40.2). The connectivity of the CH<sub>3</sub>-20 at C-17 was confirmed by a correlation between it and C-17 ( $\delta_{\text{C}}$  22.7), as well as the correlation from CH<sub>3</sub>-21 to C-11 ( $\delta_{\text{C}}$  29.9) and C-12 ( $\delta_{\text{C}}$  48.1), established its position. Therefore, compound **1** was identified as altenuline, which was not identified from nature before.

**Compound 2** was purified as faint yellow viscous oil; it was soluble in DCM and insoluble in water, indicating its low polarity.  $^1\text{H}$ NMR spectrum revealed the occurrence of two signals (br d); at  $\delta_{\text{H}}$  7.72 and 7.54 for H-2/5 and 3/4, respectively which confirm the occurrence of di-*ortho*-substituted aromatic ring. The characteristic 3'/3'' and 7'/7'' methylene group attached to O-C=O group was established from the multiplet signal at  $\delta_{\text{H}}$  4.24 and 3.99, respectively integrated for four protons, as well as methylene group at C10'/10'' appeared as triplet signal at  $\delta_{\text{H}}$  2.31 due to its attachment to C=O. Furthermore, a multiplet signal at  $\delta_{\text{H}}$  1.70 revealed the presence of a methine group (CH-4'/4'') bounded to two methylene groups. In addition, there were complex multiplet overlapping signals for several hydrogen protons characteristic for different methylene groups laying in the same chemical environment (H-5'/5'', H-6'/6'', H-11'/11'' and 12'/12''). Furthermore,  $^1\text{H}$ NMR data revealed the presence of up-field multiplet signals and broad doublet signal at  $\delta_{\text{H}}$  0.93 and 0.91, indicative of two terminal methyl groups, CH<sub>3</sub>-13'/13'' and 14'/14'', respectively.  $^{13}\text{C}$ NMR, HMQC, and APT spectrum showed the occurrence of six aromatic carbons, two of them were quaternary carbons C-1/6 (132.5) and four methine groups, C-2/5 (128.8), C-3/4 (130.9). In addition to two carbonyl carbons, one of which (C-1'/1''  $\delta_{\text{C}}$  167.7) is upfield due to its attachment to the aromatic ring while the other is downfield (C-9'/9'',  $\delta_{\text{C}}$  174.0). The downfield shift of the two-methylene groups 3'/3'' ( $\delta_{\text{C}}$  68.2) and 7'/7'' ( $\delta_{\text{C}}$  66.7) confirm their attachment to O-C=O. Moreover, the structure contained only one methine group at  $\delta_{\text{C}}$  38.7 (CH-4'/4'') and two methyl groups CH<sub>3</sub>-13'/13'' and 14'/14'' at  $\delta_{\text{C}}$  10.9 and 14.0, respectively. Furthermore, there were another five CH<sub>2</sub> groups at

$\delta_C$  30.4, 23.7, 34.4, 25.0, and 29.1 for C-5', 6', 10', 11', and 12', respectively. H-H-COSY (Fig 1) established the correlation between the aromatic ring's protons and that between the side chains' protons. Additionally, HMBC data (Fig 1) confirmed the substitution of the aromatic ring through the correlation from H-2/5 ( $\delta_C$  7.72) to C-3/4 ( $\delta_C$  130.9) and that between H-3/4 ( $\delta_C$  7.54) and C-2/5 ( $\delta_C$  128.8). The connectivity of the side chain to the aromatic ring at C-1 and C-6 was established through the correlation from H-2/5 ( $\delta_H$  7.72) to C-1'/1'' ( $\delta_C$  167.7). Moreover, the correlation from H 3'/3'' ( $\delta_H$  4.24) and C-1'/1'' ( $\delta_C$  167.7), C-4'/4'' ( $\delta_C$  38.7), C-5'/5'' ( $\delta_C$  30.4) and C-6'/6'' ( $\delta_C$  23.8) as well as that from H 7'/7'' ( $\delta_H$  3.99) and C-5'/5'' ( $\delta_C$  30.4), C-6'/6'' ( $\delta_C$  23.8) and C-9'/9'' ( $\delta_C$  174.0) gave evidence for their attachment to O-C = O. Furthermore, the connectivity of methyl group at C-14'/14'' and C-13'/13'' was confirmed by the correlation from H-14'/14'' ( $\delta_H$  0.91) to C-4'/4'' ( $\delta_C$  38.7) and that between H-13'/13'' ( $\delta_H$  0.93) with C-12'/12'' ( $\delta_C$  29.1). The other correlations which confirmed the structure were listed. Despite  $^{13}\text{C}$ NMR displaying only six aromatic carbons and twelve carbons among which two carbonyl carbons, one methine, seven methylene, and two methyl groups, the -ve ESI/MS of 2 showed  $m/z$  at 533.1912  $[\text{M} - \text{H}]^-$  which established the presence of two identical mirror image parts and considered a symmetrical dimer of 1,6 -benzene dicarboxylic acid thus, identified as phthalic acid bis (7'/7'' pentyloxy) isohexyl ester. Based on our search in Science Finder, compound 2 is considered a new natural product.

### In silico analysis for the identified metabolites against hACE-2 and SARS-CoV-2 spike RBD)-ACE-2 complex

We herein investigated the potential use of these compounds as SARS-Cov-2 inhibitors by targeting the interface between the ACE-2 receptor and the SARS-CoV-2 spike RBD (S27–S32 Figs). The solved crystal structure of the SARS-CoV-2 spike RBD complexed with ACE-2 (PDB: 6LZG) [81] was used (Fig 2). We used quercetin as a reference natural drug to validate the docking parameters.

We compared our docking results with what was previously published as we found an agreement with the literature. Quercetin was docked into the binding interface between the ACE-2 and viral (S) RBD, and it was found that nine possible conformers showed good binding affinity (-8.9 to -7.9 kcal/mol). Quercetin forms multiple non-covalent interactions, as shown in S33 Fig Using the validated docking parameters, molecular docking of compounds 2 and 4 was performed on the crystal structure of the SARS-CoV-2 spike RBD complexed with ACE-2 (Fig 3).

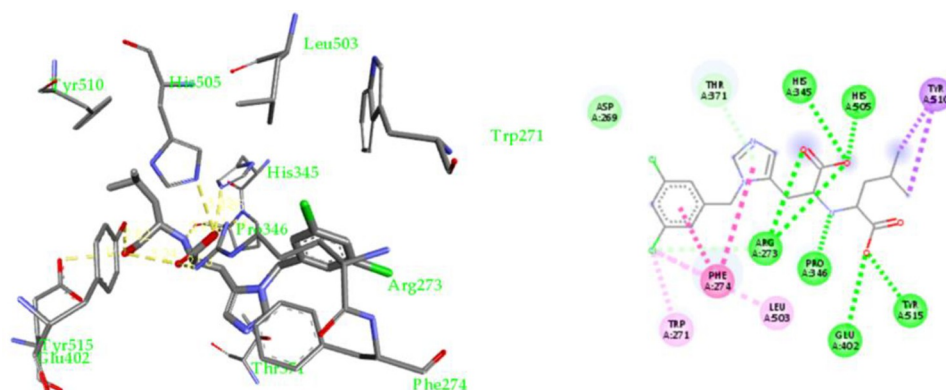

**Fig 2. X-ray crystal structure of MLN-4760 bound to human ACE-2 active site and 2-D schematic representation for its non-covalent interactions.**

<https://doi.org/10.1371/journal.pone.0313616.g002>

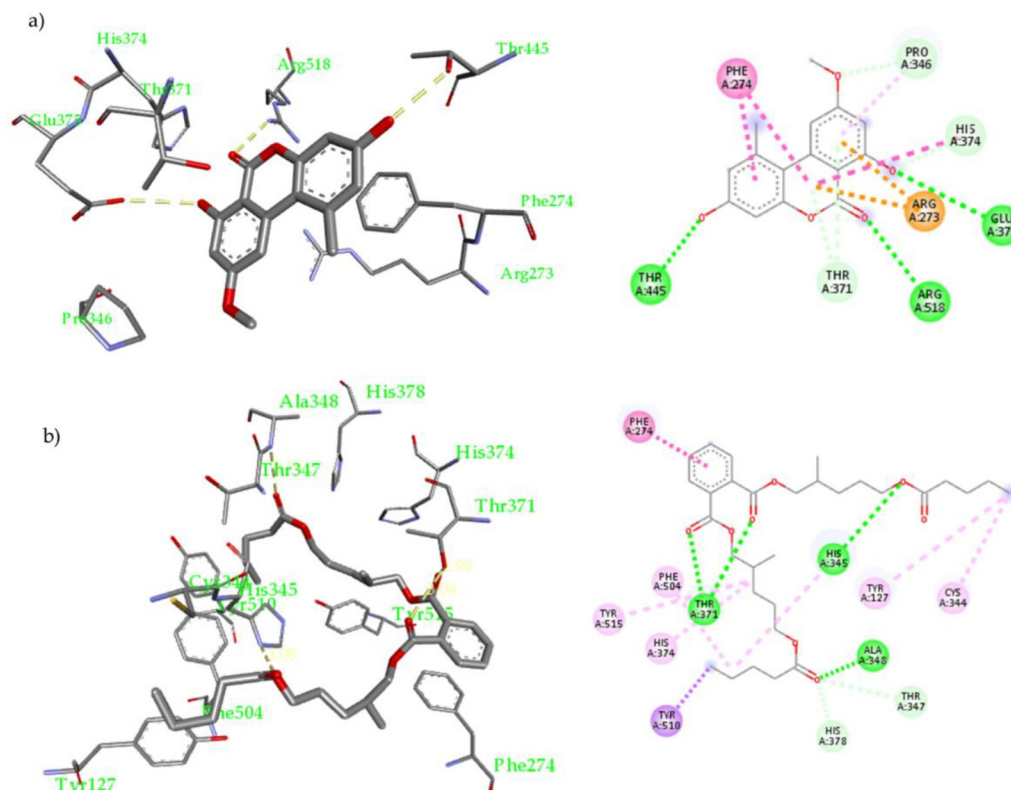

**Fig 3.** Docking of compounds **4** (a) and **2** (b) inside the ACE-2 active site; 3-D representation (left side) and 2-D schematic representation (right side) of their non-covalent interactions inside the ACE-2 active site.

<https://doi.org/10.1371/journal.pone.0313616.g003>

Compound **2** was docked into the binding interface between the ACE-2 and viral (S) RBD, and nine possible conformers resulted in having an excellent binding affinity ( $-7.3$  to  $-6.3$  kcal/mol). It was found that **2** fit in the ACE-2-Spike RBD site of interaction forming numerous non-covalent interactions, **Fig 3A**: 1) H-bonds with Asn33 (3.15 Å), Phe390 (2.94 Å), Arg393 (2.88 Å and 3.08 Å), Arg403 (2.81 Å) and Tyr505 (2.97 Å); 2). Hydrophobic interactions with His34 (4.40 Å) and Val93 (4.73 Å). Compound **4** was docked using the same parameters (**Fig 3** and **S27 Fig**), and nine possible conforms resulted in a binding affinity ( $-6.9$  to  $-6.1$  kcal/mol). It was found that **4** fit nicely in the ACE-2-Spike RBD site of interaction forming many non-covalent interactions, (**Fig 3**) H-bonds with His34 (3.19 Å), Arg393 (2.95 Å), Glu406 (2.87 Å), Arg408 (3.04 Å), Gln409 (2.94 Å) and Tyr505 (2.96 Å); 2) Hydrophobic interactions with Ala386 and Arg403. A table with full details about the docking experiment is included in the **S2 Table**, **S28–S33 Figs**.

### Inhibitory effect of endophytic compounds 1–4 on ACE-2 / Spike (RBD) protein interaction

Results shown in **Table 3** and **S34 Fig** revealed that compounds **1–4** can efficiently inhibit the interaction between ACE-2 SARS-CoV-2 Spike (RBD) protein interaction compared to quercetin ( $IC_{50}$ ,  $16.53 \pm 0.44$   $\mu$ M). Compounds **2** and **4** were the most active, with  $IC_{50}$  of  $10.40 \pm 0.25$  and  $11.70 \pm 0.34$   $\mu$ M, respectively. Moreover, EtOAc extract showed potential activity with  $IC_{50}$  of  $0.60 \pm 0.02$   $\mu$ g/mL (**Fig 4**).

**Table 3.** *In vitro* ACE2 spike RBD (SARS-CoV-2) inhibitory effect of compounds 1–4 compared to quercetin.

| Compound  | IC <sub>50</sub> (μM) |
|-----------|-----------------------|
| 1         | 15.50 ± 0.45          |
| 2         | 10.40 ± 0.25          |
| 3         | 12.50 ± 0.46          |
| 4         | 11.70 ± 0.34          |
| Quercetin | 16.53 ± 0.44          |

Data is presented as mean ± SD.

<https://doi.org/10.1371/journal.pone.0313616.t003>

## Molecular dynamic simulation results

**RMSD and RMSF analysis.** Molecular dynamic (MD) simulation provides many valuable information and parameters to study the dynamicity of biological complexes. MD could provide insights into precise estimation of the binding strength of a docked complex of a small molecule and a receptor protein. In this study, we performed some initial computational investigations through molecular dynamic simulations to assess the stability of the complex between our compounds and the *h*ACE2 active site (**S35 Fig**). Compounds 2 and 4 were found to be able to form a stable complex with the active site of ACE2 protein as indicated by their lower RMSD values. Compound 2 and 4 complexes had RMSD values of 0.19 nm and 0.2 nm, respectively. Similar results were obtained from the RMSF analysis where compound 2 and 4 complexes showed acceptable stabilities with an average RMSF of 0.17 and 0.18 nm, respectively (**Fig 5**).

The ability of compounds 2 and 4 to form stable complexes as indicated by the low RMSD and RMSF values is a valid indicator on their inhibitory effect on *h*ACE2 protein. Binding Free Energy Calculations using *MM-PBSA* approach. We followed up with binding energy calculation to better understand the strength and stability of the complex formed between our compounds and *h*ACE2 residues. This was done using the *g\_mmpbsa* package to calculate the binding free energies ( $\Delta E_{\text{binding}}$ ) between the two compounds and the ACE2 residues. We have used these tools to calculate all the forms of binding free energy including electrostatic, van der Waal, solvation and SASA energies (**Table 4**). The calculated binding free energy for both compounds supported the two compounds are expected to form a stable and strong interactions with the *h*ACE2 active site residues preventing SARS-CoV-2 S protein interactions and blocking coronavirus from entering the host cells.

## *In-silico* pharmacokinetic results

The physicochemical properties and pharmacokinetics of Lipinski's tested active compounds Prediction were estimated by the online tool SwissADME. Lipinski has here stated that if a compound follows the following parameters including molecular weight < 500 g/mol, hydrogen bond acceptor active sites < 10, hydrogen bond donor active sites < 5, and lipophilicity value  $\text{LogP} \leq 5$ , then, the compound is recommended to be with oral bioavailability. The study showed that active compound 4 followed the rules of Lipinski, with strong oral bioavailability, permeability, and absorption (**Table 5**) (**S36 Fig**) [82].

## Inhibition of ACE-2 expression on human lung microvascular endothelial cells (HLMEC)

An experimental model of HLMEC was applied to study the effects of the endophytic compounds 1–4 on ACE-2 protein expression. Preceding this analysis, the cytotoxic effect of



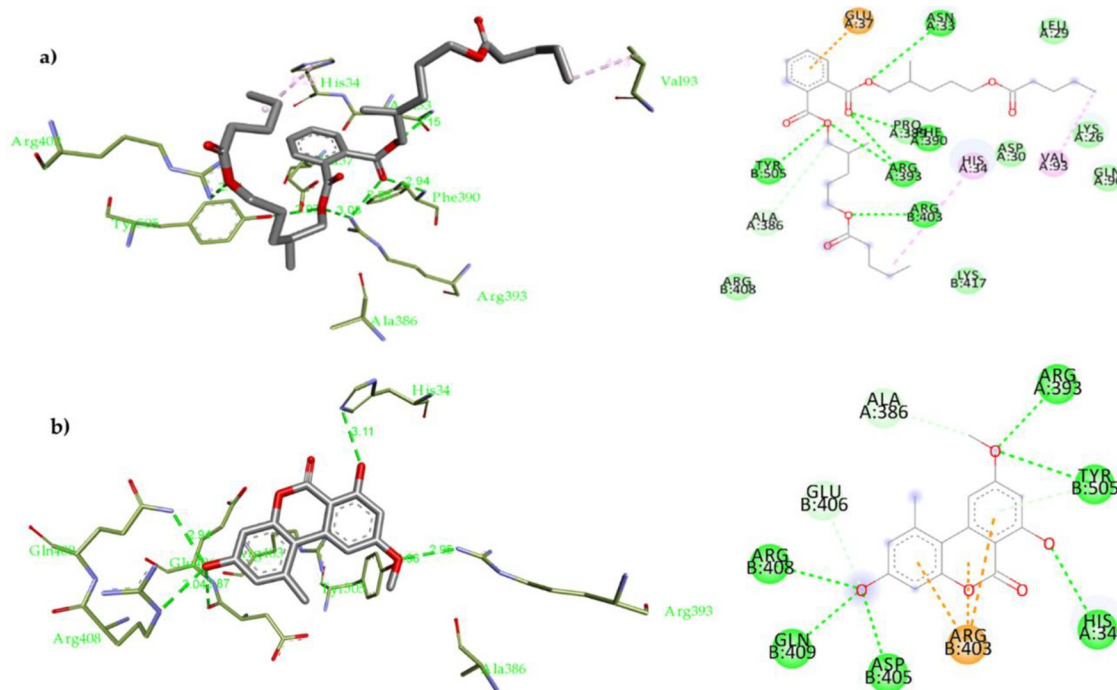

**Fig 4.** Docking of compounds **2** (a) and **4** (b) inside the binding site of SARS-CoV-2 spike RDB in complex with ACE-2; 3-D representation (left side) and 2-D schematic representation (right side) of their non-covalent interactions inside the binding site of SARS-CoV-2 spike RDB in complex with ACE-2.

<https://doi.org/10.1371/journal.pone.0313616.g004>

compounds **1–4** was determined on HLMEC using an MTT assay. HLMEC were treated with different dilutions of the test samples (0.39–100  $\mu$ M) for 48 h. Compounds **1–4** being nontoxic ( $IC_{50} > 100 \mu$ M, [Table 6](#)). Then, their effect on ACE-2 protein expression at the selected dose (25  $\mu$ M) [83] was evaluated by western blot and revealed that ACE-2 receptor protein expression was significantly inhibited by all compounds with **2** and **4** showing the greatest activity, compared to control non treated cells, ([Fig 6](#) and [Table 6](#)).

### Anti-inflammatory activity of endophytic compounds

All tested compounds ([Table 7](#) and [S37 Fig](#)) showed significant TNF- $\alpha$ : TNFR2 inhibitory activity while compounds **2** and **4** demonstrated the most active inhibitory effect compared to the positive control, certolizumab. Also, compound **3** showed the same activity as certolizumab. EtOAc extract inhibited the TNF- $\alpha$ : TNFR2 with  $IC_{50}$ ,  $0.76 \pm 0.04 \mu$ g/mL. Additionally, the alteration in TNF- $\alpha$  and IL-6 levels following the stimulation of RAW264.7 cells by LPS as a cell-based anti-inflammatory assay was estimated using quantitative real-time PCR. We noticed that both compounds exerted significant ( $p < 0.001$ ) anti-inflammatory effects as indicated by the diminished expression of TNF- $\alpha$  and IL-6 mRNA. Compound **4** demonstrated higher anti-inflammatory activity than **2** as indicated by the downregulation of the TNF- $\alpha$  and IL-6 genes expression (fold change;  $0.28 \pm 0.02$  and  $0.14 \pm 0.01$ , respectively versus  $0.45 \pm 0.07$  and  $0.30 \pm 0.02$ , respectively) compared to their corresponding levels in the LPS control, ([Fig 7](#), [S37 Fig](#)).

### Discussion

Several studies concluded that the ACE-2 receptor is the entry gate SARS-CoV-2 uses to enter target cells [84, 85]. SARS-CoV-2 attaches to human ACE-2 receptor *via* the binding of spike



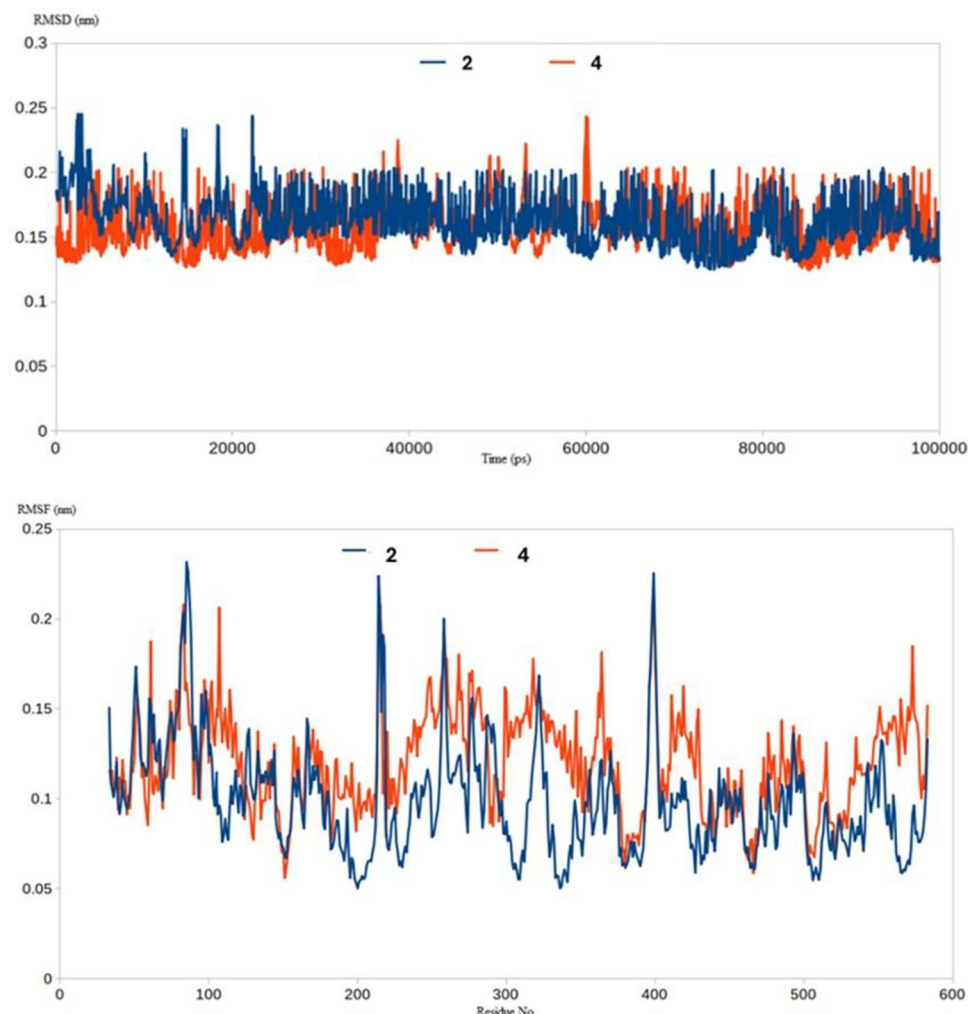

**Fig 5.** RMSD (Top) and RMSF (Bottom) analysis for the MD simulations of Compound 2 (blue) and 4 (red) inside the hACE2 active site.

<https://doi.org/10.1371/journal.pone.0313616.g005>

(S) glycoprotein and uses it to bind to the host's cell surface and promote the virus-cell membrane fusion into the host cell through the viral infection [86]. The SARS-CoV-2 S protein is a homotrimer class I fusion protein in a metastable conformation [87]. The S1 subunit comprises the RBD responsible for attaching to the host ACE-2 receptor and contributes to the stability of the S2 subunit state before the fusion process. It was found that the engagement of ACE-2 with the spike RBD involves conformational changes that intermediary expose (open state) or hide (closed state) other (S) protein binding domains required for the receptor binding [87]. The open state is the state that triggers S2 subunit fusion and viral infection. Several recently solved crystal structures for SARS-CoV-2 spike receptor binding domain complexed

**Table 4.** The binding free energies ( $\Delta E$ ) of compound 2 and 4 in complex with hACE2.

|   | $\Delta E_{\text{binding}}$ (kJ/mol) | $\Delta E_{\text{Electrostatic}}$ (kJ/mol) | $\Delta E_{\text{Vander Waal}}$ (kJ/mol) | $\Delta E_{\text{solvation}}$ (kJ/mol) | SASA (kJ/mol)   |
|---|--------------------------------------|--------------------------------------------|------------------------------------------|----------------------------------------|-----------------|
| 2 | $-87 \pm 3.5$                        | $-56.1 \pm 2.5$                            | $-70.1 \pm 2.9$                          | $57.0 \pm 5.2$                         | $-13.7 \pm 0.1$ |
| 4 | $-81.9 \pm 2.3$                      | $-54.1 \pm 1.5$                            | $-58.7 \pm 1.8$                          | $49.4 \pm 2.6$                         | $-15.8 \pm 0.1$ |

<https://doi.org/10.1371/journal.pone.0313616.t004>

Table 5. Physicochemical and pharmacokinetic properties of the active compounds.

| Compounds                                   | 2                                              | 4                                              |
|---------------------------------------------|------------------------------------------------|------------------------------------------------|
| <b>Physicochemical properties</b>           |                                                |                                                |
| Formula                                     | C <sub>30</sub> H <sub>46</sub> O <sub>8</sub> | C <sub>15</sub> H <sub>12</sub> O <sub>5</sub> |
| Molecular weight                            | 534.65 g/mol                                   | 272.25                                         |
| Heavy atoms                                 | 38                                             | 20                                             |
| Aromatic heavy atoms                        | 6                                              | 14                                             |
| Fraction Csp <sup>3</sup>                   | 0.67                                           | 0.13                                           |
| Rotatable bonds                             | 24                                             | 1                                              |
| H-bond acceptors                            | 8                                              | 5                                              |
| H-bond donors                               | 0                                              | 2                                              |
| Molar refractivity                          | 147.71                                         | 75.49                                          |
| TPSA                                        | 105.20 Å <sup>0</sup>                          | 79.90 Å <sup>0</sup>                           |
| <b>Lipophilicity &amp; water solubility</b> |                                                |                                                |
| Log <i>p</i>                                | 6.29                                           | 2.27                                           |
| ESOL Class                                  | Poor water solubility                          | Moderate water solubility                      |
| <b>Pharmacokinetic parameters</b>           |                                                |                                                |
| GI absorption                               | Low                                            | High                                           |
| BBB permeant                                | No                                             | No                                             |
| CYP1A2 inhibitor                            | No                                             | Yes                                            |
| CYP2C19 inhibitor                           | No                                             | No                                             |
| CYP2C9 inhibitor                            | Yes                                            | No                                             |
| CYP2D6 inhibitor                            | No                                             | No                                             |
| CYP3A4 inhibitor                            | Yes                                            | No                                             |
| log K <sub>p</sub> (cm/s)                   | -4.61                                          | -5.68                                          |

\*GI: gastrointestinal, BBB: blood brain barrier, CYP: Cytochrome P

<https://doi.org/10.1371/journal.pone.0313616.t005>

to ACE-2 revealed that the most critical ACE-2 residues that straight interact with SARS-CoV-2 S protein RBD are: Glu 22, Glu 23, Lys 26, Asp 30, Glu 35, Glu 56, and Glu 57.

Moreover, Lys 26, Asp 30, and His 34 residues play a severe role in the interface of SARS-CoV-2 RBS S-protein to ACE-2 thus, they are essential for the entry method [8, 81, 88]. Therapeutic approaches for blocking coronavirus from entering the host cells *via* targeting Spike proteins or ACE-2 receptors are valuable for improving potential treatment for the SARS-CoV-2 viral infection [89]. In the current study, we accomplished a thorough *in-silico* analysis for evaluating the isolated compounds against the SARS-CoV-2 spike receptor binding

Table 6. Viability of HLMEC and inhibitory effects on ACE2 protein expression in HLMEC by of compounds 1–4.

| Compound | IC <sub>50</sub> (μM) | ACE2% inhibition |
|----------|-----------------------|------------------|
| 1        | 145.45 ± 4.82         | 49.65 ± 3.06***  |
| 2        | 154.73 ± 5.22         | 70.51 ± 4.80***  |
| 3        | 117.72 ± 6.61         | 29.91 ± 4.26**   |
| 4        | 151.07 ± 4.47         | 50.85 ± 4.34***  |

Values correspond to the mean ± SD of three independent experiments. p-values < 0.01\*\* and 0.001\*\*\* are statistically significant for treated sample vs. the negative control (untreated HLMEC) using One way ANOVA followed by post hoc test.

<https://doi.org/10.1371/journal.pone.0313616.t006>

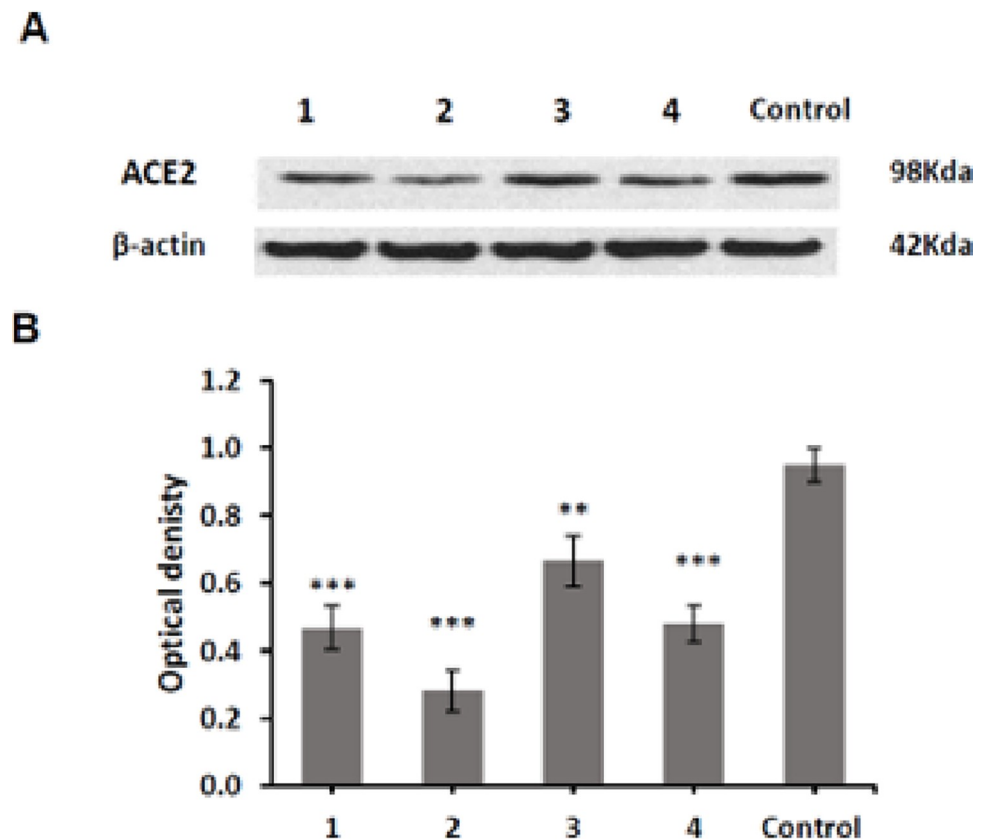

**Fig 6. Western blot analysis of ACE-2 protein expression in human lung microvascular endothelial cells (HLMVEC).** (A) One of three repeated experiments is displayed in the above figure. (B) Quantitative analysis of ACE-2 protein expression using bar chart\*\* and \*\*\*: Significantly different from negative control at  $P < 0.01$  and  $P < 0.001$ , respectively using One Way ANOVA followed by post hoc test.

<https://doi.org/10.1371/journal.pone.0313616.g006>

domain complexed with *h* ACE-2. The outcome of each *in silico* evaluation is expected to rationally explain the biological evaluation data for these compounds as potential SARS-CoV-2 inhibitors. We expected that by disrupting the interactions between the SARS-CoV-2 Spike RBD and the ACE-2 residues, the entry process of the virus would be halted, and the fusion process would not occur. A previous study showed that targeting the ACE-2 amino acid residues Lys26, Asp30, and His34 residues and the RBD motif residues Arg426 and Tyr436 lead to inhibition of SARS-CoV-2 S protein from interacting with *h*ACE-2 [90]. The results of the *in-silico* analysis for all compounds binding showed that these compounds bind nicely to the

**Table 7. *In vitro* TNF- $\alpha$  inhibitory effect of the compounds 1–4.**

| Compound     | IC <sub>50</sub> ( $\mu$ M) |
|--------------|-----------------------------|
| 1            | 8.70 $\pm$ 0.34             |
| 2            | 5.40 $\pm$ 0.33             |
| 3            | 6.70 $\pm$ 0.39             |
| 4            | 4.97 $\pm$ 0.28             |
| Certolizumab | 6.70 $\pm$ 0.34             |

Data is presented as mean  $\pm$  SD.

<https://doi.org/10.1371/journal.pone.0313616.t007>

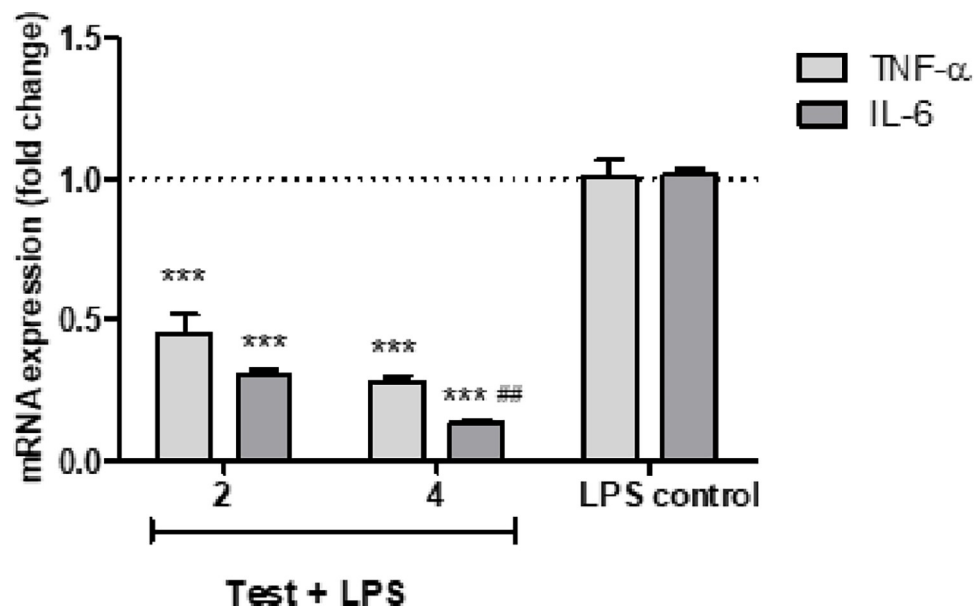

**Fig 7. The effect of compounds 2 and 4 on TNF- $\alpha$  and IL-6 mRNA in LPS-stimulated RAW 264.7 macrophages.** Cells were stimulated with LPS (1  $\mu$ g/ mL). Values are presented as mean  $\pm$  SD mRNA expression fold changes of three tests referenced to Actb: the housekeeping gene. \*\*\*, ##: Significant at  $p < 0.001$  and  $< 0.01$  compared to the mRNA levels of the LPS control group and compound 2, respectively.

<https://doi.org/10.1371/journal.pone.0313616.g007>

interacting site between the ACE-2 and the SARS-CoV-2 S protein RBD binding, proposing that these metabolites can be used as potential SARS-CoV-2 inhibitors. For additional analysis, the biological evaluation of these compounds was performed.

Because of the severe sequels of the COVID-19 infection epidemic, discovering a probable means for inhibition of viral virulence and invasion is of ultimate value [91]. Thus, in the current research study, guided by the molecular docking results, we assessed the two new compounds (1 and 2) together with three known compounds (3–5) [33, 79, 80] isolated from the EtOAc extract of *A. alternata* for their ability to hinder the interaction between ACE-2 and SARS-CoV-2 spike-protein receptor binding domains. We found that agreeing with the molecular docking results, those compounds may offer promising protection against viral infection by blocking this entry path for SARS-CoV-2 with  $IC_{50}$  values lower than  $16.53 \pm 0.44$   $\mu$ M, which corresponds to that of quercetin; the most efficient ACE-2 fixative among other polyphenolic compounds [92] (S29 and S30 Figs).

An additional novel part of our study included experimental proof of the effectiveness of the endophytic metabolites in hindering ACE-2 receptor expression in the microvascular lung endothelial cells. We found that compounds 2 (% inhibition,  $70.51 \pm 4.80$ ) and 4 (% inhibition,  $50.85 \pm 4.34$ ) demonstrated the most potent inhibitory activity ( $P < 0.001$ ) against ACE-2 receptor expression. Several metabolites obtained from microbial fungi and bacteria similar to the chemical class of our compounds were studied for their inhibition of ACE-2 with SARS-CoV-2 [93]. Moreover, the previous docking and dynamic study for compounds 4 and 5 and other microbial compounds revealed their ability to inhibit SARS-CoV-2 [94]. During the life cycle of the virus, several factors can control the host's response toward certain viral infections [95]. The initial disease stage includes the viral phase with the appearance of some symptoms. As the infection proceeds, the inflammatory phase substitutes the viral phase to manage the viral replication. However, the host cells are damaged [96]. Therefore, antiviral drugs are active during the viral phase and then become ineffective [97], while treatment options for managing

inflammatory infections during the inflammatory phase, include using anti-inflammatory agents [26].

Lately, increasing studies point out that the "cytokine storm," characterized by the intense release of TNF- $\alpha$  and IL-6, could contribute to the mortality caused by COVID-19 [98]. The interaction between ACE-2 and SARS-CoV-2 is a vital issue in viral infections, causing the release of inflammatory proteins like TNF- $\alpha$  [99]. This pleiotropic pro-inflammatory cytokine binds to a membrane receptor called tumor necrosis factor receptor 2 (TNFR2), mainly expressed in the immune system cells, like the regulatory T cells. The excessive release of TNF- $\alpha$ , as a part of the cytokine storm, provokes vascular and capillary barrier dysfunction, diffusing alveolar damage, and multi-organ failure. Likewise, it plays a severe role in disturbing the lung epithelial and endothelial barriers, which may have been revealed to ARDS [100]. Owing to this critical role of TNF- $\alpha$  in prompting COVID-19-related cytokine storm syndrome, it is crucial to screen for new approaches as anti-TNF therapy [101].

Due to the close relation between ACE-2 inhibition and the anti-TNF- $\alpha$  agents and encouraged by the promising ACE-2 inhibition showed by the endophytic compounds thus, in the present work, we checked the impact of secondary metabolites and the EtOAc extract on TNF- $\alpha$  inhibition, initially by an *in vitro* assay which showed that compounds **2** and **4** exhibited the most effective inhibition with IC<sub>50</sub> values lower than  $6.70 \pm 0.34 \mu\text{M}$ , which corresponds to certolizumab.

LPS-stimulated macrophages produce undue levels of cytokines such as TNF- $\alpha$  and IL-6 [102]. Thus, we performed an *in vitro* cell-based anti-inflammatory effect for the most active metabolites *viz* **2** and **4** using LPS-induced RAW 264.7 cells to assess their role against the cytokine response by estimating TNF- $\alpha$  and IL-6 levels. Both compounds revealed a potential anti-inflammatory activity, however, compound **4** was more effective causing significant downregulation ( $P < 0.001$ ) of both genes. Likewise, it was reported that the extracts of *A. alternata* exhibited reduced TNF- $\alpha$  production in LPS-stimulated macrophages [103, 104]. Hence, the current study revealed the bioactive potentiality of the tested compounds from the EtOAc extract of *A. alternata* isolated from the leaves of *C. viminalis* against SARS-CoV-2. Additionally, the promising anti-inflammatory activities shown by these compounds can be beneficial for the treatment of several inflammatory disorders such as inflammatory bowel disease, lung conditions such as ARDS, chronic obstructive pulmonary disease (COPD), or pulmonary fibrosis, diabetic nephropathy, and chronic kidney disease, in addition to neuroinflammation, neurodegeneration, and neurological disorders like Alzheimer's disease. Since one-third of FDA-approved drugs in the US markets are natural products [105], our work focuses on the use of natural products for the management of coronavirus-related illnesses and demonstrates the promising prospects of natural products from *A. alternata* against coronavirus by listing some natural pure compounds isolated from *A. alternata* and their therapeutic means, offering references for subsequent related research studies.

Large-scale production of these biomolecules using different biotechnological tools could enhance *in vivo* and clinical studies.

## Conclusion

The assessments of microbial metabolites for antiviral activity attract researchers due to their advantages over plant, animal, and synthetic sources. Therefore, the request for antiviral microbial compounds is gradually increasing due to plant extraction and chemical synthesis need time and economic issues. Consequently, we isolated and purified *A. alternata* from the leaves of *C. viminalis*. We succeeded in isolating two novel compounds (altenuline **1**, phthalic acid bis (7'/7" pentyloxy) isohexyl ester **2**) along with three known ones (1-deoxyruberactone

3, alternariol-5-*O*-methyl ether 4 and alternariol 5) from its EtOAc extract. Based on the *in-silico* and *in vitro* studies, all isolated compounds, especially compounds 2 and 4, can inhibit the virus entry into the host cells by blocking the interaction between ACE-2 with CoV-19 spike-protein receptor binding domains as well, their ability to decrease ACE-2 expression which is abundantly present in human lung microvascular endothelial cells. Moreover, they exhibited promising anti-inflammatory effects through TNF- $\alpha$ : TNFR2 inhibitory activity in addition to their inhibitory effect on TNF- $\alpha$  and IL-6, the predominant cytokines in COVID-19-related cytokine storm *via* cell-based anti-inflammatory assay. The most active compounds against ACE-2 and proinflammatory cytokines were compounds 2 and 4 and the SwissADME prediction tool displayed their drug-like characters. Combining the anti-ACE-2 and anti-inflammatory activities of these compounds enhanced their predicted effectiveness to control viral invasion, and to ameliorate the disease progression. Thus, the active compounds isolated from *A. alternate* could be utilized as a potential ingredient in phytopharmaceuticals for managing COVID-19. However, additional studies are essential for their safety in clinical settings.

### Limitations and for future work

- Liquid culture media for isolation of the metabolites not used in this study for isolation of the compounds due to the facility's limitations in our lab.
- To add value to our work, we may test the compounds against coronavirus using a pseudovirus entry inhibition assay followed by an infectious prototypic SARSCoV2 cytotoxic effect inhibition assay in Vero E6 cells. However, these assays were unavailable when the research study was done.
- *in vivo* study for the metabolites and the extract should be done to study their effects using animal models and explain their safety
- Clinical study should be done for the most effective compounds

### Supporting information

**S1 Fig.** <sup>1</sup>HNMR spectrum of compound 1 (400 MHz, CDCl<sub>3</sub>).  
(JPG)

**S2 Fig.** <sup>13</sup>CNMR spectrum of compound 1 (100 MHz, CDCl<sub>3</sub>).  
(JPG)

**S3 Fig.** APT spectrum of compound 1 (100 MHz, CDCl<sub>3</sub>).  
(JPG)

**S4 Fig.** HMQC spectrum of compound 1 (400 MHz, CDCl<sub>3</sub>).  
(JPG)

**S5 Fig.** HMBC spectrum of compound 1 (400 MHz, CDCl<sub>3</sub>).  
(JPG)

**S6 Fig.** H-HCOSY spectrum of compound 1 (400 MHz, CDCl<sub>3</sub>).  
(JPG)

**S7 Fig.** Positive ESI/MS spectrum of compound 1.  
(JPG)



**S8 Fig.  $^1\text{H}$ NMR spectrum of compound 2 (400 MHz,  $\text{CDCl}_3$ ).**  
(JPG)

**S9 Fig.  $^{13}\text{C}$ NMR spectrum of compound 2 (100 MHz,  $\text{CDCl}_3$ ).**  
(JPG)

**S10 Fig. APT spectrum of compound 2 (100 MHz,  $\text{CDCl}_3$ ).**  
(JPG)

**S11 Fig. HMQC spectrum expansion of compound 2 (400 MHz,  $\text{CDCl}_3$ ).**  
(JPG)

**S12 Fig. HMBC spectrum of compound 2 (400 MHz,  $\text{CDCl}_3$ ).**  
(JPG)

**S13 Fig. H-HCOSY spectrum of compound 2 (400 MHz,  $\text{CDCl}_3$ ).**  
(JPG)

**S14 Fig. Negative ESI/MS spectrum of compound 2.**  
(JPG)

**S15 Fig.  $^1\text{H}$ NMR spectrum of compound 3 (400 MHz,  $\text{CDCl}_3$ ).**  
(JPG)

**S16 Fig.  $^{13}\text{C}$ NMR spectrum of compound 3 (100 MHz,  $\text{CDCl}_3$ ).**  
(JPG)

**S17 Fig. HMQC spectrum of compound 3 (400 MHz,  $\text{CDCl}_3$ ).**  
(JPG)

**S18 Fig. HMBC spectrum of compound 3 (400 MHz,  $\text{CDCl}_3$ ).**  
(JPG)

**S19 Fig. H-HCOSY spectrum of compound 3 (400 MHz,  $\text{CDCl}_3$ ).**  
(JPG)

**S20 Fig. Negative ESI/MS spectrum of compound 3.**  
(JPG)

**S21 Fig. Negative ESI/MS spectrum of compound 3.**  
(JPG)

**S22 Fig. Negative ESI/MS spectrum of compound 4.**  
(JPG)

**S23 Fig. Positive ESI/MS spectrum of compound 4.**  
(JPG)

**S24 Fig.  $^1\text{H}$ NMR spectrum of compound 5.**  
(JPG)

**S25 Fig. Negative ESI/MS spectrum of compound 5.**  
(JPG)

**S26 Fig. Phylogenetic trees showing relationship of strain *Alternaria alternate* isolate with other related fungal species retrieved from GenBank based on their sequence homologies of 18srDNA.**  
(JPG)

**S27 Fig. Docking results for compound MLN-4760 & compound 1–4 inside human ACE2 active site.**

(JPG)

**S28 Fig. 3D docked model of compound 2 & 4 bound to the ACE2 protein.**

(JPG)

**S29 Fig. 3D docked model of compound 3 inside the ACE2 active site showing possible non-covalent interactions with protein residues.**

(JPG)

**S30 Fig. The inhibition of ACE2 will prevent the SARS-CoV-2 spike protein from binding [adapted from reference [86]] and as a result no viral entry to the cell.**

(JPG)

**S31 Fig. Docking results for compound 2&4 inside the binding site of SARS-Cov-2 S protein RBD in complex with ACE2.**

(JPG)

**S32 Fig. Docking of compound 2&4 inside the binding site of SARS-Cov-2 S protein RBD in complex with ACE2.**

(JPG)

**S33 Fig. Docking of quercetin inside the binding site of SARS-Cov-2 S protein RBD in complex with ACE2 (S29E Fig. Docking of Quercetin inside the binding site of SARS-Cov-2 S protein RBD in complex with ACE2. (Quercetin was docked into the binding interface between the ACE2 and viral (S) RBD and 9 possible conformers were obtained with good binding affinity (ranging from -8.9 to -7.9 kcal/mol)).**

(JPG)

**S34 Fig. % inhibition of compounds 1–4 on ACE2: Spike RBD (SARS-CoV-2) interaction. Values represent % ACE2 inhibition (mean  $\pm$  SD) of three replicates.**

(JPG)

**S35 Fig. SwissADME BOILED-Egg plot comparing compounds (1–5) *in silico* ADME and drug likeness properties.**

(JPG)

**S36 Fig. The physicochemical descriptors, ADME parameters, pharmacokinetic (PK) properties and drug likeness of compounds (1–5) in this study predicted by SwissADME tool (<http://www.swissadme.ch/index.php>).**

(JPG)

**S37 Fig. Effects of compounds 1–4 on TNF- $\alpha$  inhibition compared to certolizumab. Values represent % TNF- $\alpha$  inhibition (mean  $\pm$  SD) of three replicates.**

(JPG)

**S1 Table. TNF- $\alpha$ , IL-6 and  $\beta$ -actin primer sequences for RT-PCR.**

(DOCX)

**S2 Table. In silico study, describe briefly the binding affinity, binding amino acids, bond length.**

(DOCX)

**S1 Raw images.**

(PDF)

## Author Contributions

**Data curation:** Fatma A. Moharram, Shahenda Mahgoub, Mohamed S. Mady.

**Funding acquisition:** Hui-Chi Huang, Kuei-Hung Lai.

**Investigation:** Fatma A. Moharram, Mohamed S. Mady.

**Methodology:** Shahenda Mahgoub, Mohamed S. Abdel-Aziz, Ahmed M. Said, Kuei-Hung Lai, Nashwa Hashad, Mohamed S. Mady.

**Resources:** Nashwa Hashad.

**Software:** Shahenda Mahgoub, Ahmed M. Said, Mohamed S. Mady.

**Supervision:** Fatma A. Moharram, Reham R. Ibrahim, Mohamed S. Abdel-Aziz.

**Writing – original draft:** Fatma A. Moharram, Reham R. Ibrahim, Shahenda Mahgoub, Ahmed M. Said, Nashwa Hashad, Mohamed S. Mady.

**Writing – review & editing:** Fatma A. Moharram, Shahenda Mahgoub, Ahmed M. Said, Lo-Yun Chen, Kuei-Hung Lai, Mohamed S. Mady.

## References

1. Zhou P, Yang XL, Wang XG, Hu B, Zhang L, Zhang W, et al. A pneumonia outbreak associated with a new coronavirus of probable bat origin. *Nature*. 2020; 579(7798):270–3. Epub 2020/02/06. <https://doi.org/10.1038/s41586-020-2012-7> PMID: 32015507; PubMed Central PMCID: PMC7095418.
2. Sharma RK, Stevens BR, Obukhov AG, Grant MB, Oudit GY, Li Q, et al. ACE2 (Angiotensin-Converting Enzyme 2) in Cardiopulmonary Diseases: Ramifications for the Control of SARS-CoV-2. *Hypertension*. 2020; 76(3):651–61. Epub 2020/08/14. <https://doi.org/10.1161/HYPERTENSIONAHA.120.15595> PMID: 32783758; PubMed Central PMCID: PMC7430041.
3. Datta PK, Liu F, Fischer T, Rappaport J, Qin X. SARS-CoV-2 pandemic and research gaps: Understanding SARS-CoV-2 interaction with the ACE2 receptor and implications for therapy. *Theranostics*. 2020; 10(16):7448–64. <https://doi.org/10.7150/thno.48076> PMID: 32642005
4. Crackower MA, Sarao R, Oudit GY, Yagil C, Kozieradzki I, Scanga SE, et al. Angiotensin-converting enzyme 2 is an essential regulator of heart function. *Nature*. 2002; 417(6891):822–8. <https://doi.org/10.1038/nature00786> PMID: 12075344
5. Santos RAS, Sampaio WO, Alzamora AC, Motta-Santos D, Alenina N, Bader M, et al. The ACE2/Angiotensin-(1–7)/MAS Axis of the Renin-Angiotensin System: Focus on Angiotensin-(1–7). *Physiological Reviews*. 2017; 98(1):505–53. <https://doi.org/10.1152/physrev.00023.2016>
6. Ocaranza MP, Godoy I, Jalil JE, Varas M, Collantes P, Pinto M, et al. Enalapril Attenuates Downregulation of Angiotensin-Converting Enzyme 2 in the Late Phase of Ventricular Dysfunction in Myocardial Infarcted Rat. *Hypertension*. 2006; 48(4):572–8. <https://doi.org/10.1161/01.HYP.0000237862.94083.45> PMID: 16908757
7. Bahbah EI, Negida A, Nabet MS. Purposing Saikosaponins for the treatment of COVID-19. *Med Hypotheses*. 2020; 140:109782. Epub 2020/05/01. <https://doi.org/10.1016/j.mehy.2020.109782> PMID: 32353743; PubMed Central PMCID: PMC7179490.
8. Lan J, Ge J, Yu J, Shan S, Zhou H, Fan S, et al. Structure of the SARS-CoV-2 spike receptor-binding domain bound to the ACE2 receptor. *Nature*. 2020; 581(7807):215–20. <https://doi.org/10.1038/s41586-020-2180-5> PMID: 32225176
9. Benigni A, Cassis P, Remuzzi G. Angiotensin II revisited: new roles in inflammation, immunology and aging. *EMBO Mol Med*. 2010; 2(7):247–57. <https://doi.org/10.1002/emmm.201000080> PMID: 20597104
10. Dandona P, Dhindsa S, Ghanim H, Chaudhuri A. Angiotensin II and inflammation: the effect of angiotensin-converting enzyme inhibition and angiotensin II receptor blockade. *J Hum Hypertens*. 2007; 21(1):20–7. <https://doi.org/10.1038/sj.jhh.1002101> PMID: 17096009
11. Hirano T, Murakami M. COVID-19: A New Virus, but a Familiar Receptor and Cytokine Release Syndrome. *Immunity*. 2020; 52(1097–4180 (Electronic)):731–3. <https://doi.org/10.1016/j.immuni.2020.04.003> PMID: 32325025

12. Chen R, Wang K, Yu J, Howard D, French L, Chen Z, et al. The Spatial and Cell-Type Distribution of SARS-CoV-2 Receptor ACE2 in the Human and Mouse Brains. *Front Neurol*. 2021; 11. <https://doi.org/10.3389/fneur.2020.573095> PMID: 33551947
13. Zhang S, Liu Y, Wang X, Yang L, Li H, Wang Y, et al. SARS-CoV-2 binds platelet ACE2 to enhance thrombosis in COVID-19. *J Hematol Oncol*. 2020; 13(1):120. Epub 2020/09/06. <https://doi.org/10.1186/s13045-020-00954-7> PMID: 32887634; PubMed Central PMCID: PMC7471641.
14. Notarte KIR, Quimque MTJ, Macaranas IT, Khan A, Pastrana AM, Villaflores OB, et al. Attenuation of Lipopolysaccharide-Induced Inflammatory Responses through Inhibition of the NF- $\kappa$ B Pathway and the Increased NRF2 Level by a Flavonol-Enriched n-Butanol Fraction from *Uvaria alba*. *ACS Omega*. 2023; 8(6):5377–92. <https://doi.org/10.1021/acsomega.2c06451>
15. Saeedi-Boroujeni A, Mahmoudian-Sani MR. Anti-inflammatory potential of Quercetin in COVID-19 treatment. *J Inflamm (Lond)*. 2021; 18(1):3. Epub 2021/01/30. <https://doi.org/10.1186/s12950-021-00268-6> PMID: 33509217; PubMed Central PMCID: PMC7840793.
16. Othman H, Bouslama Z, Brandenburg JT, da Rocha J, Hamdi Y, Ghedira K, et al. Interaction of the spike protein RBD from SARS-CoV-2 with ACE2: Similarity with SARS-CoV, hot-spot analysis and effect of the receptor polymorphism. *Biochem Biophys Res Commun*. 2020; 527(3):702–8. Epub 2020/05/16. <https://doi.org/10.1016/j.bbrc.2020.05.028> PMID: 32410735; PubMed Central PMCID: PMC7221370.
17. Xia S, Zhu Y, Liu M, Lan Q, Xu W, Wu Y, et al. Fusion mechanism of 2019-nCoV and fusion inhibitors targeting HR1 domain in spike protein. *Cell Mol Immunol*. 2020; 17(7):765–7. Epub 2020/02/13. <https://doi.org/10.1038/s41423-020-0374-2> PMID: 32047258; PubMed Central PMCID: PMC7075278.
18. Xu Y, Lou Z, Liu Y, Pang H, Tien P, Gao GF, et al. Crystal structure of severe acute respiratory syndrome coronavirus spike protein fusion core. *J Biol Chem*. 2004; 279(47):49414–9. Epub 2004/09/04. <https://doi.org/10.1074/jbc.M408782200> PMID: 15345712; PubMed Central PMCID: PMC8008698.
19. Jani V, Koulgi S, Uppuladinne M, Sonavane U. Computational Drug Repurposing Studies on the ACE2-Spike (RBD) Interface of SARS-CoV-2/2020.
20. Chen J, Jiang Q, Xia X, Liu K, Yu Z, Tao W, et al. Individual variation of the SARS-CoV-2 receptor ACE2 gene expression and regulation. *Aging Cell*. 2020; 19(7):e13168. Epub 2020/06/20. <https://doi.org/10.1111/acer.13168> PMID: 32558150; PubMed Central PMCID: PMC7323071.
21. Islam MT, Sarkar C, El-Kersh DM, Jamaddar S, Uddin SJ, Shilpi JA, et al. Natural products and their derivatives against coronavirus: A review of the non-clinical and pre-clinical data. *PHYTOTHER RES*. 2020; 34(10):2471–92. <https://doi.org/10.1002/ptr.6700> PMID: 32248575
22. Chen G, Di Wu WG, Yong Cao DH, Hongwu Wang TW, Xiaoyun Zhang HC, Haijing Yu XZ, et al. Clinical and immunological features of severe and moderate coronavirus disease 2019. *J Clin Invest* 2020; 130:5. <https://doi.org/10.1172/JCI137244> PMID: 32217835
23. Pedersen SF, Ho Y-C. SARS-CoV-2: a storm is raging. *J Clin Invest*. 2020; 130(5). <https://doi.org/10.1172/JCI137647> PMID: 32217834
24. Mangalmurti N, Hunter CA. Cytokine Storms: Understanding COVID-19. *Immunity*. 2020; 53(1):19–25. Epub 2020/07/02. <https://doi.org/10.1016/j.immuni.2020.06.017> PMID: 32610079; PubMed Central PMCID: PMC7321048.
25. Zipeto D, Palmeira JdF, Argañaraz GA, Argañaraz ER. ACE2/ADAM17/TMPRSS2 Interplay May Be the Main Risk Factor for COVID-19. *Front Immunol*. 2020; 11. <https://doi.org/10.3389/fimmu.2020.576745> PMID: 33117379
26. Yang J, Petitjean SJL, Koehler M, Zhang Q, Dumitru AC, Chen W, et al. Molecular interaction and inhibition of SARS-CoV-2 binding to the ACE2 receptor. *Nature Communications*. 2020; 11(1):4541. <https://doi.org/10.1038/s41467-020-18319-6> PMID: 32917884
27. Quimque Tristan M, Notarte Israel K, Adviento Amor X, Cabunoc Harvey M, de Leon Novi V, delos Reyes Steven Louis F, et al. Polyphenolic Natural Products Active In Silico Against SARS-CoV-2 Spike Receptor Binding Domains and Non-structural Proteins—A Review. *Combinatorial Chemistry & High Throughput Screening*. 2023; 26(3):459–88. <http://dx.doi.org/10.2174/1386207325666210917113207>.
28. Brogi S, Quimque MT, Notarte KI, Africa JG, Hernandez JB, Tan SM, et al. Virtual Combinatorial Library Screening of Quinadoline B Derivatives against SARS-CoV-2 RNA-Dependent RNA Polymerase. *Computation [Internet]*. 2022; 10(1).
29. Ahmad K, Athar F. Phytochemistry and Pharmacology of *Callistemon viminalis* (Myrtaceae): A Review. *Nat Prod J*. 2017; 7(3):166–75. <https://doi.org/10.2174/2210315507666161216100323>
30. Abd J. Studying of antibacterial effect for leaves extract of *Callistemon viminalis* in vitro and vivo (urinary system) for rabbits. *JOK*. 2012; 8:246–54.

31. Salem MZM, El-Hefny M, Nasser RA, Ali HM, El-Shanhorey NA, Elansary HO. Medicinal and biological values of *Callistemon viminalis* extracts: History, current situation and prospects. *Asian Pac J Trop Med*. 2017; 10(3):229–37. Epub 2017/04/27. <https://doi.org/10.1016/j.apjtm.2017.03.015> PMID: 28442106.
32. Ahmed AH. Phytochemical and Cytotoxicity Studies of *Callistemon viminalis* Leaves Extract Growing in Egypt. *Curr Pharm Biotechnol*. 2020; 21(3):219–25. Epub 2019/11/08. <https://doi.org/10.2174/1389201020666191107110341> PMID: 31696815.
33. De Souza GD, Mithöfer A, Daolio C, Schneider B, Rodrigues-Filho E. Identification of *Alternaria alternata* mycotoxins by LC-SPE-NMR and their cytotoxic effects to soybean (*Glycine max*) cell suspension culture. *Molecules*. 2013; 18(3):2528–38. <https://doi.org/10.3390/molecules18032528>
34. Gohar AA, Maatooq GT, Gadara SR, Aboelmaaty WS. One new pyrroline compound from *Callistemon viminalis* (Sol. Ex Gaertner) G. Don Ex Loudon. *Nat Prod Res*. 2013; 27(13):1179–85. Epub 2012/09/13. <https://doi.org/10.1080/14786419.2012.718771> PMID: 22967219.
35. Mahgoub S, Hashad N, Ali S, Ibrahim R, Said AM, Moharram FA, et al. Polyphenolic Profile of *Callistemon viminalis* Aerial Parts: Antioxidant, Anticancer and In Silico 5-LOX Inhibitory Evaluations. *Molecules*. 2021; 26(9). Epub 2021/05/01. <https://doi.org/10.3390/molecules26092481> PMID: 33923148; PubMed Central PMCID: PMC8123052.
36. Salem MZ, Ali HM, El-Shanhorey NA, Abdel-Megeed A. Evaluation of extracts and essential oil from *Callistemon viminalis* leaves: antibacterial and antioxidant activities, total phenolic and flavonoid contents. *Asian Pac J Trop Med*. 2013; 6(10):785–91. Epub 2013/07/23. [https://doi.org/10.1016/S1995-7645\(13\)60139-X](https://doi.org/10.1016/S1995-7645(13)60139-X) PMID: 23870467.
37. Liu HX, Chen K, Liu Y, Li C, Wu JW, Xu ZF, et al. Calliminols A-E, new terpenoid-conjugated phloroglucinols from the leaves of *Callistemon viminalis*. *Fitoterapia*. 2016; 115:142–7. Epub 2016/10/30. <https://doi.org/10.1016/j.fitote.2016.10.007> PMID: 27777133.
38. Wu JW, Li BL, Tang C, Ke CQ, Zhu NL, Qiu SX, et al. Callistemonols A and B, Potent Antimicrobial Acylphloroglucinol Derivatives with Unusual Carbon Skeletons from *Callistemon viminalis*. *J Nat Prod*. 2019; 82(7):1917–22. Epub 2019/07/06. <https://doi.org/10.1021/acs.jnatprod.9b00064> PMID: 31276403.
39. Wu L, Zhang Y, Wang X, Liu R, Yang M, Kong L, et al. Acylphloroglucinols from the fruits of *Callistemon viminalis*. *Phytochem Lett*. 2017; 20:61–5. <https://doi.org/10.1016/j.phytol.2017.04.014>
40. Ahmad K. Evaluating anti-oxidant potential of *Callistemon viminalis* leaves extracts and their compounds in STAT 3 pathway in liver cancer. *Annals of Oncology*. 2017; 28(suppl\_10):mdx652. 013. <https://doi.org/10.1093/annonc/mdx652.013>
41. Kamble SS, Gacche RN. Evaluation of anti-breast cancer, anti-angiogenic and antioxidant properties of selected medicinal plants. *EuJIM*. 2019; 25:13–9. <https://doi.org/10.1016/j.eujim.2018.11.006>
42. Bhagat M, Sangral M, Pandita S, Vironica, Gupta S, Bindu K. Pleiotropic Chemodiversity in Extracts and Essential Oil of *Melaleuca viminalis* and *Melaleuca armillaris* of Myrtaceae Family. *JERP*. 2017; 2(4):113–20. <https://doi.org/10.14218/jerp.2016.00036>
43. Hasan N, Mamun A, Belal H, Rahman A, Ali H, Tasnin N, et al. A report on antioxidant and antibacterial properties of *Callistemon viminalis* leaf. *International Journal of Pharmaceutical Science and Research*. 2016; 1(7):36–41.
44. Tiwari U, Jadon M, Nigam D. Evaluation of antioxidant and antibacterial activities of methanolic leaf extract of *Calistemon viminalis*. *JPSBM*. 2014; 2:1–12.
45. Abdelhady MI, Youns M. *In-vitro* evaluation of the antidiabetic activity of bottle brush plants. *RRBS*. 2014; 9(4):134–6.
46. Shareef H, Naeem S, Zaheer E. Comparative Analgesic Activity of Selected Medicinal Plants from Pakistan. *Proceedings of the Pakistan Academy of Sciences: B Life and Environmental Sciences*. 2019; 56(3):57–67–57–67.
47. Mei C, Flinn BS. The use of beneficial microbial endophytes for plant biomass and stress tolerance improvement. *Recent Pat Biotechnol*. 2010; 4(1):81–95. Epub 2010/03/06. <https://doi.org/10.2174/187220810790069523> PMID: 20201804.
48. dela Cruz TEE, Notarte KIR, Apurillo CCS, Tarman K, Bungihan ME. Chapter 4—Biomining fungal endophytes from tropical plants and seaweeds for drug discovery. In: Ozturk M, Egamberdieva D, Pešić M, editors. *Biodiversity and Biomedicine*: Academic Press; 2020. p. 51–62.
49. Chung KR. Stress Response and Pathogenicity of the Necrotrophic Fungal Pathogen *Alternaria alternata*. *Scientifica* 2012; 2012:635431. Epub 2012/01/01. <https://doi.org/10.6064/2012/635431> PMID: 24278721; PubMed Central PMCID: PMC3820455.
50. Montemurro N, Visconti A. *Alternaria* metabolites—chemical and biological data. *Alternaria: biology, plant diseases, and metabolites*/editors, J Chelkowski and A Visconti. 1992.

51. Eram D, Arthikala M-K, Melappa G, Santoyo G. *Alternaria* species: endophytic fungi as alternative sources of bioactive compounds. Italian Journal of Mycology. 2018; 47:40–54. <https://doi.org/10.6092/issn.2531-7342/8468>
52. Lou J, Fu L, Peng Y, Zhou L. Metabolites from *Alternaria* fungi and their bioactivities. Molecules. 2013; 18(5):5891–935. <https://doi.org/10.3390/molecules18055891>
53. Noor AO, Almasri DM, Bagalagel AA, Abdallah HM, Mohamed SGA, Mohamed GA, et al. Naturally Occurring Isocoumarins Derivatives from Endophytic Fungi: Sources, Isolation, Structural Characterization, Biosynthesis, and Biological Activities. Molecules. 2020; 25(2):395. Epub 2020/01/23. <https://doi.org/10.3390/molecules25020395> PMID: 31963586; PubMed Central PMCID: PMC7024277.
54. Pilapil JD, Notarte KI, Yeung KL. The dominance of co-circulating SARS-CoV-2 variants in wastewater. International Journal of Hygiene and Environmental Health. 2023; 253:114224. <https://doi.org/10.1016/j.ijheh.2023.114224> PMID: 37523818
55. Frediansyah AA-O, Sofyantoro FA-O, Alhumaid SA-O, Al Mutair A, Albayat H, Altaweil HI, et al. Microbial Natural Products with Antiviral Activities, Including Anti-SARS-CoV-2: A Review. LID— LID— 4305. Molecules. 2022; 7(1420–3049 (Electronic)):4305. <https://doi.org/10.3390/molecules27134305>
56. Giovinazzo G, Gerardi C, Uberti-Foppa C, Lopalco L. Can Natural Polyphenols Help in Reducing Cytokine Storm in COVID-19 Patients? Molecules. 2020; 25(24):5888. <https://doi.org/10.3390/molecules25245888> PMID: 33322757
57. Hashad N, Ibrahim R, Mady M, Abdel-Aziz MS, Moharram FA. Review: Bioactive metabolites and host-specific toxins from endophytic Fungi, *Alternaria alternata*. Vietnam Journal of Chemistry. 2021; 59(6):733–59. <https://doi.org/10.1002/vjch.202100099>
58. Hawas UW, El-Desouky S, Abou El-Kassem L, Elkhateeb W. Alternariol derivatives from *Alternaria alternata*, an endophytic fungus residing in red sea soft coral, inhibit HCV NS3/4A protease. Applied Biochemistry and Microbiology. 2015; 51(5):579–84. <https://doi.org/10.1134/S0003683815050099>
59. Petrini O. Taxonomy of endophytic fungi of aerial plant tissues. Microbiology of the phyllosphere/edited by NJ Fokkema and J van den Heuvel. 1986.
60. Schulz B, Wanke U, Draeger S, Aust HJ. Endophytes from herbaceous plants and shrubs: effectiveness of surface sterilization methods. Mycol Res. 1993; 97(12):1447–50. [https://doi.org/10.1016/S0953-7562\(09\)80215-3](https://doi.org/10.1016/S0953-7562(09)80215-3)
61. Innis MA, Gelfand DH, Sninsky JJ, White TJ. PCR protocols: a guide to methods and applications: Academic press; 2012.
62. Idris A-m, Al-tahir I, Idris E. Antibacterial activity of endophytic fungi extracts from the medicinal plant *Kigelia africana*. Egypt Acad J Biol Sci. 2013; 5(1):1–9.
63. Fayek M, Ebrahim H, Elsayed H, Abelaziz M, Kariuki B, Moharram F. Anti-prostate cancer metabolites from the soil-derived *Aspergillus neoniveus*. Front Pharmacol. 2022; 13. <https://doi.org/10.3389/fphar.2022.1006062> PMID: 36313355
64. Fayek M, Ebrahim HY, Abdel-Aziz MS, Taha H, Moharram FA-O. Bioactive metabolites identified from *Aspergillus terreus* derived from soil. AMB Express, 13(1), 107. 2023; 13:107. <https://doi.org/10.1186/s13568-023-01612-0> PMID: 37789186
65. Trott O, Olson AJ. AutoDock Vina: Improving the speed and accuracy of docking with a new scoring function, efficient optimization, and multithreading. Journal of Computational Chemistry. 2010; 31(2):455–61. <https://doi.org/10.1002/jcc.21334> PMID: 19499576
66. Abraham MJ, Murtola T, Schulz R, Páll S, Smith JC, Hess B, et al. GROMACS: High performance molecular simulations through multi-level parallelism from laptops to supercomputers. SoftwareX. 2015; 1–2:19–25. <https://doi.org/10.1016/j.softx.2015.06.001>
67. Kumari R, Kumar R, Lynn A. g\_mmpbsa—A GROMACS Tool for High-Throughput MM-PBSA Calculations. Journal of Chemical Information and Modeling. 2014; 54(7):1951–62. <https://doi.org/10.1021/ci500020m> PMID: 24850022
68. Lee S, Lee IH, Kim HJ, Chang GS, Chung JE, No KT. The PreADME Approach: Web-based program for rapid prediction of physico-chemical, drug absorption and drug-like properties. euro QSAR 2002—Designing Drugs and Crop Protectants: Processes Problems and Solutions. 2002:418–20.
69. Yan R, Zhang Y, Li Y, Xia L, Guo Y, Zhou Q. Structural basis for the recognition of SARS-CoV-2 by full-length human ACE2. Science. 2020; 367(6485):1444–8. Epub 2020/03/07. <https://doi.org/10.1126/science.abb2762> PMID: 32132184; PubMed Central PMCID: PMC7164635.
70. Hoffmann M, Kleine-Weber H, Schroeder S, Kruger N, Herrler T, Erichsen S, et al. SARS-CoV-2 Cell Entry Depends on ACE2 and TMPRSS2 and Is Blocked by a Clinically Proven Protease Inhibitor. Cell. 2020; 181(2):271–80 e8. Epub 2020/03/07. <https://doi.org/10.1016/j.cell.2020.02.052> PMID: 32142651; PubMed Central PMCID: PMC7102627.



71. Colunga Biancatelli RML, Berrill M, Catravas JD, Marik PE. Quercetin and Vitamin C: An Experimental, Synergistic Therapy for the Prevention and Treatment of SARS-CoV-2 Related Disease (COVID-19). 2020; 11. <https://doi.org/10.3389/fimmu.2020.01451> PMID: 32636851
72. Manjunath SH, Thimmulappa RK. Antiviral, immunomodulatory, and anticoagulant effects of quercetin and its derivatives: Potential role in prevention and management of COVID-19. Journal of Pharmaceutical Analysis. 2022; 12(1):29–34. <https://doi.org/10.1016/j.jpha.2021.09.009> PMID: 34567823
73. Mosmann T. Rapid colorimetric assay for cellular growth and survival: application to proliferation and cytotoxicity assays. Journal of immunological methods. 1983; 65(1–2):55–63. [https://doi.org/10.1016/0022-1759\(83\)90303-4](https://doi.org/10.1016/0022-1759(83)90303-4) PMID: 6606682
74. Bradford MM. A rapid and sensitive method for the quantitation of microgram quantities of protein utilizing the principle of protein-dye binding. Anal Biochem. 1976; 72:248–54. Epub 1976/05/07. [https://doi.org/10.1016/0003-2697\(76\)90527-3](https://doi.org/10.1016/0003-2697(76)90527-3) PMID: 942051
75. Correia R, Fernandes B, Alves PM, Carrondo MJT, Roldão A. Improving Influenza HA-Vlps Production in Insect High Five Cells via Adaptive Laboratory Evolution. Vaccines [Internet]. 2020; 8(4). <https://doi.org/10.3390/vaccines8040589> PMID: 33036359
76. Ortí-Casañ N, Wu Y, Naudé PJW, De Deyn PP, Zuhorn IS, Eisel ULM. Targeting TNFR2 as a novel therapeutic strategy for Alzheimer's disease. Front Neurosci. 2019; 13:49. <https://doi.org/10.3389/fnins.2019.00049> PMID: 30778285
77. Vanamee ES, Faustman DL. TNFR2: A Novel Target for Cancer Immunotherapy. Trends Mol Med. 2017; 23(11):1037–46. Epub 2017/10/17. <https://doi.org/10.1016/j.molmed.2017.09.007> PMID: 29032004.
78. Mahgoub S, Fatahala SS, Sayed AI, Atya HB, El-Shehry MF, Afifi H, et al. Novel hit of DPP-4Is as promising antihyperglycemic agents with dual antioxidant/anti-inflammatory effects for type 2 diabetes with/without COVID-19. Bioorganic Chemistry. 2022; 128:106092. <https://doi.org/10.1016/j.bioorg.2022.106092> PMID: 35985159
79. Hassan A. Novel natural products from endophytic fungi of Egyptian medicinal plants-chemical and biological characterization [Dissertation]. Düsseldorf: Universität Düsseldorf. 2007.
80. Naganuma M, Nishida M, Kuramochi K, Sugawara F, Yoshida H, Mizushima Y. 1-deoxyrubralactone, a novel specific inhibitor of families X and Y of eukaryotic DNA polymerases from a fungal strain derived from sea algae. Bioorg Med Chem. 2008; 16(6):2939–44. Epub 2008/01/08. <https://doi.org/10.1016/j.bmc.2007.12.044> PMID: 18178092.
81. Wang Q, Zhang Y, Wu L, Niu S, Song C, Zhang Z, et al. Structural and Functional Basis of SARS-CoV-2 Entry by Using Human ACE2. Cell. 2020; 181(4):894–904.e9. <https://doi.org/10.1016/j.cell.2020.03.045> PMID: 32275855
82. Alam S, Rashid MA, Sarker MMR, Emon NU, Arman M, Mohamed IN, et al. Antidiarrheal, antimicrobial and antioxidant potentials of methanol extract of *Colocasia gigantea* Hook. f. leaves: evidenced from in vivo and in vitro studies along with computer-aided approaches. BMC Complementary Medicine and Therapies. 2021; 21(1):119. <https://doi.org/10.1186/s12906-021-03290-6>
83. Senthil Kumar KJ, Gokila Vani M, Wang C-S, Chen C-C, Chen Y-C, Lu L-P, et al. Geranium and lemon essential oils and their active compounds downregulate angiotensin-converting enzyme 2 (ACE2), a SARS-CoV-2 spike receptor-binding domain, in epithelial cells. Plants. 2020; 9(6):770. <https://doi.org/10.3390/plants9060770> PMID: 32575476
84. Sternberg A, Naujokat C. Structural features of coronavirus SARS-CoV-2 spike protein: Targets for vaccination. Life Sciences. 2020; 257:118056. <https://doi.org/10.1016/j.lfs.2020.118056> PMID: 32645344
85. Scialo F, Daniele A, Amato F, Pastore L, Matera MG, Cazzola MA-O, et al. ACE2: The Major Cell Entry Receptor for SARS-CoV-2. Lung. 2020; 198(1432–1750 (Electronic)):867–77. <https://doi.org/10.1007/s00408-020-00408-4> PMID: 33170317
86. Muchtaridi M, Fauzi M, Khairul Ikram NK, Mohd Gazzali A, Wahab HA. Natural Flavonoids as Potential Angiotensin-Converting Enzyme 2 Inhibitors for Anti-SARS-CoV-2. Molecules. 2020; 25(17). Epub 2020/09/05. <https://doi.org/10.3390/molecules25173980> PMID: 32882868; PubMed Central PMCID: PMC7504743.
87. Huang Y, Yang C, Xu X-f, Xu W, Liu S-w. Structural and functional properties of SARS-CoV-2 spike protein: potential antivirus drug development for COVID-19. Acta Pharmacologica Sinica. 2020; 41(9):1141–9. <https://doi.org/10.1038/s41401-020-0485-4> PMID: 32747721
88. Shang J, Ye G, Shi K, Wan Y, Luo C, Aihara H, et al. Structural basis of receptor recognition by SARS-CoV-2. Nature. 2020; 581(7807):221–4. <https://doi.org/10.1038/s41586-020-2179-y> PMID: 32225175
89. Iacob S, Iacob DG. SARS-CoV-2 Treatment Approaches: Numerous Options, No Certainty for a Versatile Virus. Front Pharmacol. 2020; 11. <https://doi.org/10.3389/fphar.2020.01224> PMID: 32982720

90. Chen C, Boorla VS, Banerjee D, Chowdhury R, Cavener VS, Nissly RH, et al. Computational prediction of the effect of amino acid changes on the binding affinity between SARS-CoV-2 spike RBD and human ACE2. *Proceedings of the National Academy of Sciences*. 2021; 118(42):e2106480118. <https://doi.org/10.1073/pnas.2106480118> PMID: 34588290
91. Dalan R, Bornstein SR, El-Armouche A, Rodionov RN, Markov A, Wielockx B, et al. The ACE-2 in COVID-19: Foe or Friend? *Horm Metab Res*. 2020; 52(5):257–63. Epub 2020/04/28. <https://doi.org/10.1055/a-1155-0501> PMID: 32340044; PubMed Central PMCID: PMC7339082.
92. Liu X, Raghuvanshi R, Ceylan FD, Bolling BW. Quercetin and Its Metabolites Inhibit Recombinant Human Angiotensin-Converting Enzyme 2 (ACE2) Activity. *Journal of Agricultural and Food Chemistry*. 2020; 68(47):13982–9. <https://doi.org/10.1021/acs.jafc.0c05064> PMID: 33179911
93. Raihan T, Rabbee MF, Roy P, Choudhury S, Baek K-H, Azad AK. Microbial Metabolites: The Emerging Hotspot of Antiviral Compounds as Potential Candidates to Avert Viral Pandemic Alike COVID-19. *Front Mol Biosci*. 2021; 8:732256. <https://doi.org/10.3389/fmolb.2021.732256> PMID: 34557521
94. Ebrahimi KS, Ansari M, Hosseini Moghaddam MS, Ebrahimi Z, Salehi Z, Shahlaei M, et al. In silico investigation on the inhibitory effect of fungal secondary metabolites on RNA dependent RNA polymerase of SARS-CoV-II: A docking and molecular dynamic simulation study. *Computers in Biology and Medicine*. 2021; 135:104613. <https://doi.org/10.1016/j.compbiomed.2021.104613> PMID: 34242870
95. Hakim MS. SARS-CoV-2, Covid-19, and the debunking of conspiracy theories. *Reviews in Medical Virology*. 2021; 31(6):e2222. <https://doi.org/10.1002/rmv.2222> PMID: 33586302
96. Peiris JS, Lai St Fau—Poon LLM, Poon Li Fau—Guan Y, Guan Y Fau—Yam LYC, Yam Ly Fau—Lim W, Lim W Fau—Nicholls J, et al. Coronavirus as a possible cause of severe acute respiratory syndrome. *Lancet*. 2003; 361(0140–6736 (Print)):1319–25. [https://doi.org/10.1016/s0140-6736\(03\)13077-2](https://doi.org/10.1016/s0140-6736(03)13077-2) PMID: 12711465
97. Widagdo W, Begeman L, Schipper D, Run PRv, Cunningham AA, Kley N, et al. Tissue distribution of the MERS-coronavirus receptor in bats. *Scientific Reports*. 2017; 7(1):1193. <https://doi.org/10.1038/s41598-017-01290-6> PMID: 28446791
98. Tang Y, Liu J, Zhang D, Xu Z, Ji J, Wen C. Cytokine Storm in COVID-19: The Current Evidence and Treatment Strategies. *Front Immunol*. 2020; 11. <https://doi.org/10.3389/fimmu.2020.01708> PMID: 32754163
99. Salesi M, Shojaie B, Farajzadegan Z, Salesi N, Mohammadi E. TNF- $\alpha$  Blockers Showed Prophylactic Effects in Preventing COVID-19 in Patients with Rheumatoid Arthritis and Seronegative Spondyloarthropathies: A Case–Control Study. *Rheumatol Ther*. 2021; 8(3):1355–70. <https://doi.org/10.1007/s40744-021-00342-8>
100. Shimizu M. Clinical features of cytokine storm syndrome. *Cytokine storm syndrome*: Springer; 2019. p. 31–41.
101. Robinson PC, Richards D, Tanner HL, Feldmann M. Accumulating evidence suggests anti-TNF therapy needs to be given trial priority in COVID-19 treatment. *The Lancet Rheumatology*. 2020; 2(11):e653–e5. [https://doi.org/10.1016/S2665-9913\(20\)30309-X](https://doi.org/10.1016/S2665-9913(20)30309-X) PMID: 33521660
102. Muniandy K, Gothai S, Badran KMH, Suresh Kumar S, Esa NM, Arulselvan P. Suppression of Proinflammatory Cytokines and Mediators in LPS-Induced RAW 264.7 Macrophages by Stem Extract of *Alternanthera sessilis* via the Inhibition of the NF- $\kappa$ B Pathway. *J Immun Res*. 2018; 2018:3430684. <https://doi.org/10.1155/2018/3430684>
103. Spina R, Ropars A, Bouazzi S, Dadi S, Lemièrè P, Dupire F, et al. Screening of Anti-Inflammatory Activity and Metabolomics Analysis of Endophytic Fungal Extracts; Identification and Characterization of Perylenequinones and Terpenoids from the Interesting Active *Alternaria* Endophyte. *Molecules*. 2023; 28(18):6531. <https://doi.org/10.3390/molecules28186531> PMID: 37764307
104. Park S-Y, Jeon J, Kim JA, Jeon MJ, Jeong M-H, Kim Y, et al. Draft genome sequence of *Alternaria alternata* JS-1623, a fungal endophyte of *Abies koreana*. *Mycobiology*. 2020; 48(3):240–4. <https://doi.org/10.1080/12298093.2020.1756134> PMID: 37970559
105. Huang J, Tao G, Liu J, Cai J, Huang Z, Chen J-x. Current prevention of COVID-19: natural products and herbal medicine. *Frontiers in Pharmacology*. 2020; 11:588508. <https://doi.org/10.3389/fphar.2020.588508> PMID: 33178026
